# Supplementary material for: Novel cytotoxic steroidal saponins from the roots of Liriope muscari (Decne.) L.H. Bailey
Source: Royal Society of Chemistry journal article supplement (doi:10.1039/c6ra26031d), 2017-01-01

### List of Supplementary Data

**Figure S1.**  $^1\text{H}$  NMR spectrum of compound **1** (pyridine- $d_5$ )

**Figure S2.**  $^{13}\text{C}$  NMR spectrum of compound **1** (pyridine- $d_5$ )

**Figure S3.** HSQC NMR spectrum of compound **1** (pyridine- $d_5$ )

**Figure S4.** HMBC NMR spectrum of compound **1** (pyridine- $d_5$ )

**Figure S5.** TOCSY NMR spectrum of compound **1** (pyridine- $d_5$ )

**Figure S6.** ESI-Q-TOF-MS spectrum of compound **1**

**Figure S7.** IR (KBr, disc) spectrum of compound **1**

**Figure S8.**  $^1\text{H}$  NMR spectrum of compound **2** (pyridine- $d_5$ )

**Figure S9.**  $^{13}\text{C}$  NMR spectrum of compound **2** (pyridine- $d_5$ )

**Figure S10.** HSQC NMR spectrum of compound **2** (pyridine- $d_5$ )

**Figure S11.** HMBC NMR spectrum of compound **2** (pyridine- $d_5$ )

**Figure S12.** TOCSY NMR spectrum of compound **2** (pyridine- $d_5$ )

**Figure S13.** ESI-Q-TOF-MS spectrum of compound **2**

**Figure S14.** IR (KBr, disc) spectrum of compound **2**

**Figure S15.**  $^1\text{H}$  NMR spectrum of compound **3** (pyridine- $d_5$ )

**Figure S16.**  $^{13}\text{C}$  NMR spectrum of compound **3** (pyridine- $d_5$ )

**Figure S17.** HSQC NMR spectrum of compound **3** (pyridine- $d_5$ )

**Figure S18.** HMBC NMR spectrum of compound **3** (pyridine- $d_5$ )

**Figure S19.** TOCSY NMR spectrum of compound **3** (pyridine- $d_5$ )

**Figure S20.** ESI-Q-TOF-MS spectrum of compound **3**

**Figure S21.** IR (KBr, disc) spectrum of compound **3**

**Figure S22.**  $^1\text{H}$  NMR spectrum of compound **4** (pyridine- $d_5$ )

**Figure S23.**  $^{13}\text{C}$  NMR spectrum of compound **4** (pyridine- $d_5$ )

**Figure S24.** HSQC NMR spectrum of compound **4** (pyridine- $d_5$ )

**Figure S25.** HMBC NMR spectrum of compound **4** (pyridine- $d_5$ )

**Figure S26.** TOCSY NMR spectrum of compound **4** (pyridine- $d_5$ )

**Figure S27.** ESI-Q-TOF-MS spectrum of compound **4**

**Figure S28.** IR (KBr, disc) spectrum of compound **4**

**Figure S29.**  $^1\text{H}$  NMR spectrum of compound **5** (pyridine- $d_5$ )

**Figure S30.**  $^{13}\text{C}$  NMR spectrum of compound **5** (pyridine- $d_5$ )

**Figure S31.** HSQC NMR spectrum of compound **5** (pyridine- $d_5$ )

**Figure S32.** HMBC NMR spectrum of compound **5** (pyridine- $d_5$ )

**Figure S33.** TOCSY NMR spectrum of compound **5** (pyridine- $d_5$ )

**Figure S34.** ESI-Q-TOF-MS spectrum of compound **5**

**Figure S35.** IR (KBr, disc) spectrum of compound **5**

**Figure S36.**  $^1\text{H}$  NMR spectrum of compound **6** (pyridine- $d_5$ )

**Figure S37.**  $^{13}\text{C}$  NMR spectrum of compound **6** (pyridine- $d_5$ )

**Figure S38.** HSQC NMR spectrum of compound **6** (pyridine- $d_5$ )

**Figure S39.** HMBC NMR spectrum of compound **6** (pyridine- $d_5$ )

**Figure S40.** TOCSY NMR spectrum of compound **6** (pyridine- $d_5$ )

**Figure S41.** ESI-Q-TOF-MS spectrum of compound **6**

**Figure S42.** IR (KBr, disc) spectrum of compound **6**

**Figure S43.**  $^1\text{H}$  NMR spectrum of compound **7** (pyridine- $d_5$ )

**Figure S44.**  $^{13}\text{C}$  NMR spectrum of compound **7** (pyridine- $d_5$ )

**Figure S45.** HSQC NMR spectrum of compound **7** (pyridine- $d_5$ )

**Figure S46.** HMBC NMR spectrum of compound **7** (pyridine- $d_5$ )

**Figure S47.** ESI-Q-TOF-MS spectrum of compound **7**

**Figure S48.** IR (KBr, disc) spectrum of compound **7**

**Figure S49.**  $^1\text{H}$  NMR spectrum of compound **8** (pyridine- $d_5$ )

**Figure S50.**  $^{13}\text{C}$  NMR spectrum of compound **8** (pyridine- $d_5$ )

**Figure S51.** HSQC NMR spectrum of compound **8** (pyridine- $d_5$ )

**Figure S52.** HMBC NMR spectrum of compound **8** (pyridine- $d_5$ )

**Figure S53.** TOCSY NMR spectrum of compound **8** (pyridine- $d_5$ )

**Figure S54.** ESI-Q-TOF-MS spectrum of compound **8**

**Figure S55.** IR (KBr, disc) spectrum of compound **8**

**Figure S56.**  $^1\text{H}$  NMR spectrum of compound **9** (pyridine- $d_5$ )

**Figure S57.**  $^{13}\text{C}$  NMR spectrum of compound **9** (pyridine- $d_5$ )

**Figure S58.** HSQC NMR spectrum of compound **9** (pyridine- $d_5$ )

**Figure S59.** HMBC NMR spectrum of compound **9** (pyridine- $d_5$ )

**Figure S60.** TOCSY NMR spectrum of compound **9** (pyridine-*d*<sub>5</sub>)

**Figure S61.** ESI-Q-TOF-MS spectrum of compound **9**

**Figure S62.** IR (KBr, disc) spectrum of compound **9**

**Figure S63.** <sup>1</sup>H NMR spectrum of compound **10** (pyridine-*d*<sub>5</sub>)

**Figure S64.** <sup>13</sup>C NMR spectrum of compound **10** (pyridine-*d*<sub>5</sub>)

**Figure S65.** HSQC NMR spectrum of compound **10** (pyridine-*d*<sub>5</sub>)

**Figure S66.** HMBC NMR spectrum of compound **10** (pyridine-*d*<sub>5</sub>)

**Figure S67.** TOCSY NMR spectrum of compound **10** (pyridine-*d*<sub>5</sub>)

**Figure S68.** ESI-Q-TOF-MS spectrum of compound **10**

**Figure S69.** IR (KBr, disc) spectrum of compound **10**

**Figure S70.** <sup>1</sup>H NMR spectrum of compound **11** (pyridine-*d*<sub>5</sub>)

**Figure S71.** <sup>13</sup>C NMR spectrum of compound **11** (pyridine-*d*<sub>5</sub>)

**Figure S72.** <sup>1</sup>H NMR spectrum of compound **12** (pyridine-*d*<sub>5</sub>)

**Figure S73.** <sup>13</sup>C NMR spectrum of compound **12** (pyridine-*d*<sub>5</sub>)

**Figure S74.** <sup>1</sup>H NMR spectrum of compound **13** (pyridine-*d*<sub>5</sub>)

**Figure S75.** <sup>13</sup>C NMR spectrum of compound **13** (pyridine-*d*<sub>5</sub>)

**Figure S1.**  $^1\text{H}$  NMR spectrum of compound **1** (pyridine- $d_5$ )

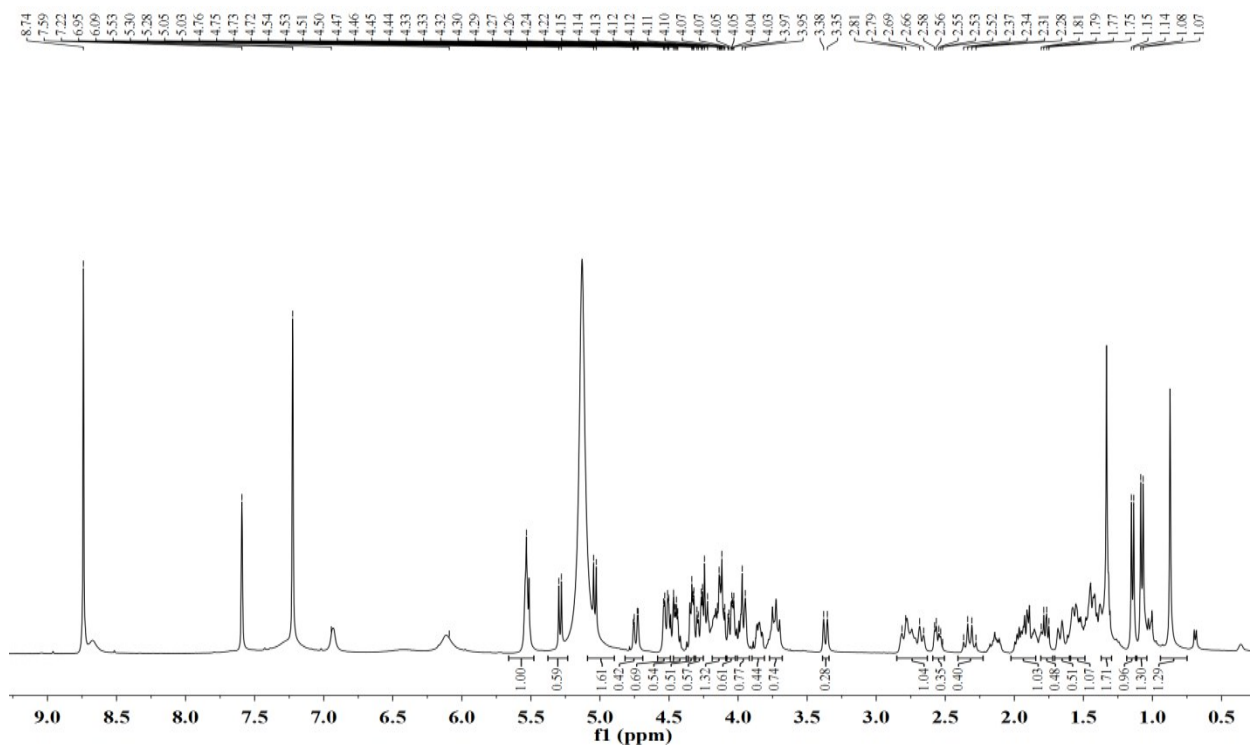

**Figure S2.**  $^{13}\text{C}$  NMR spectrum of compound **1** (pyridine- $d_5$ )

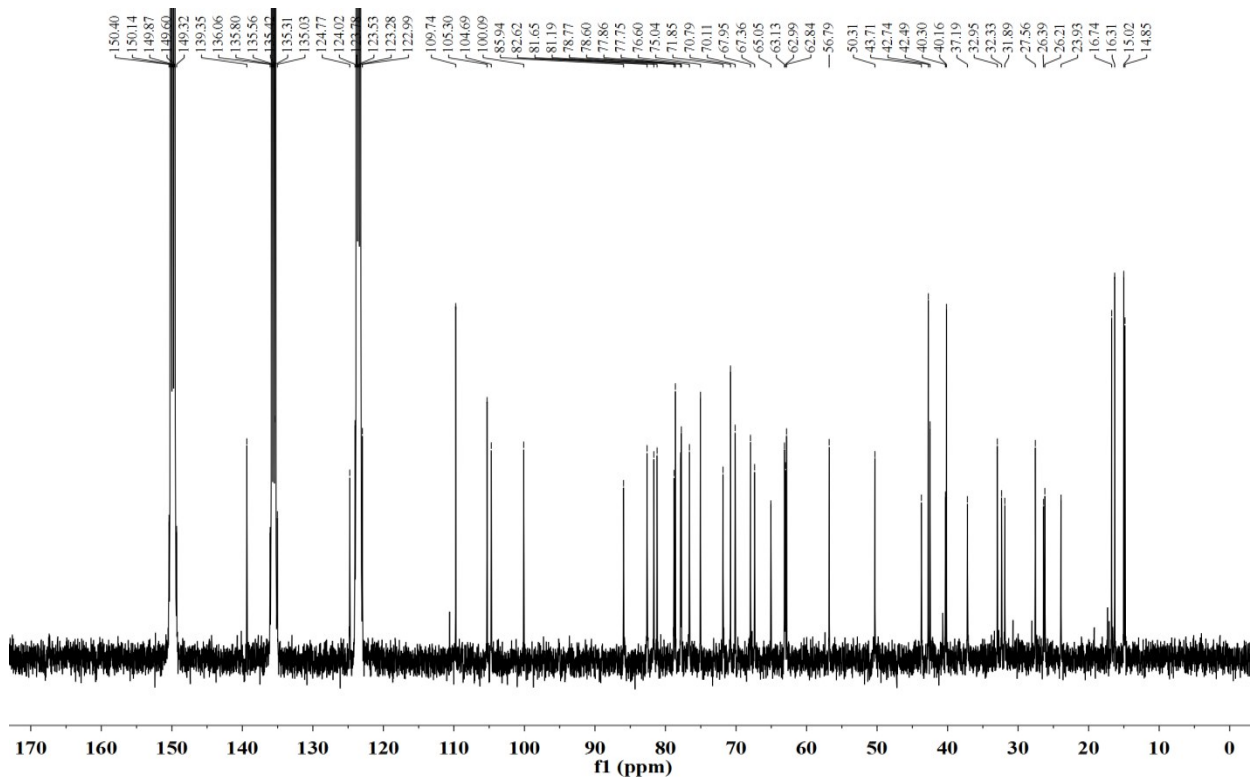

**Figure S3.** HSQC NMR spectrum of compound **1** (pyridine- $d_5$ )

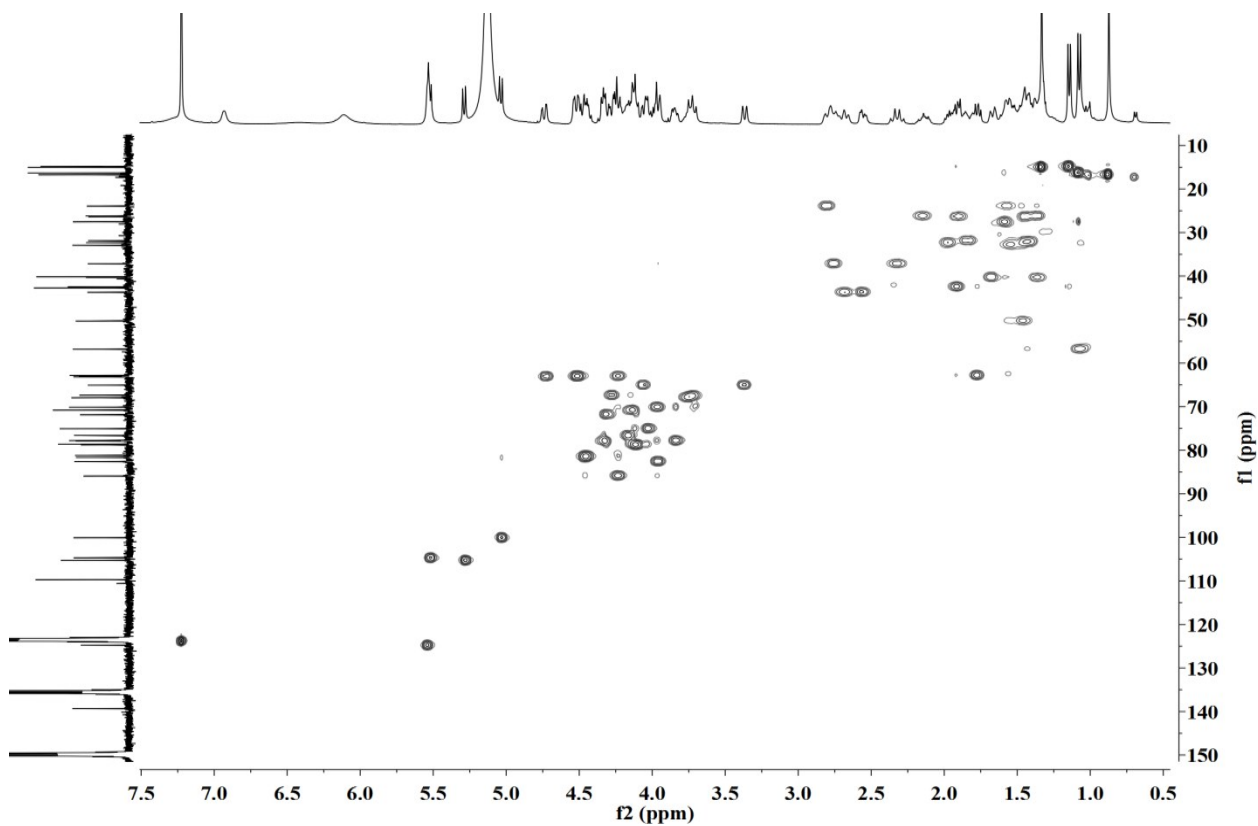

**Figure S4.** HMBC NMR spectrum of compound **1** (pyridine- $d_5$ )

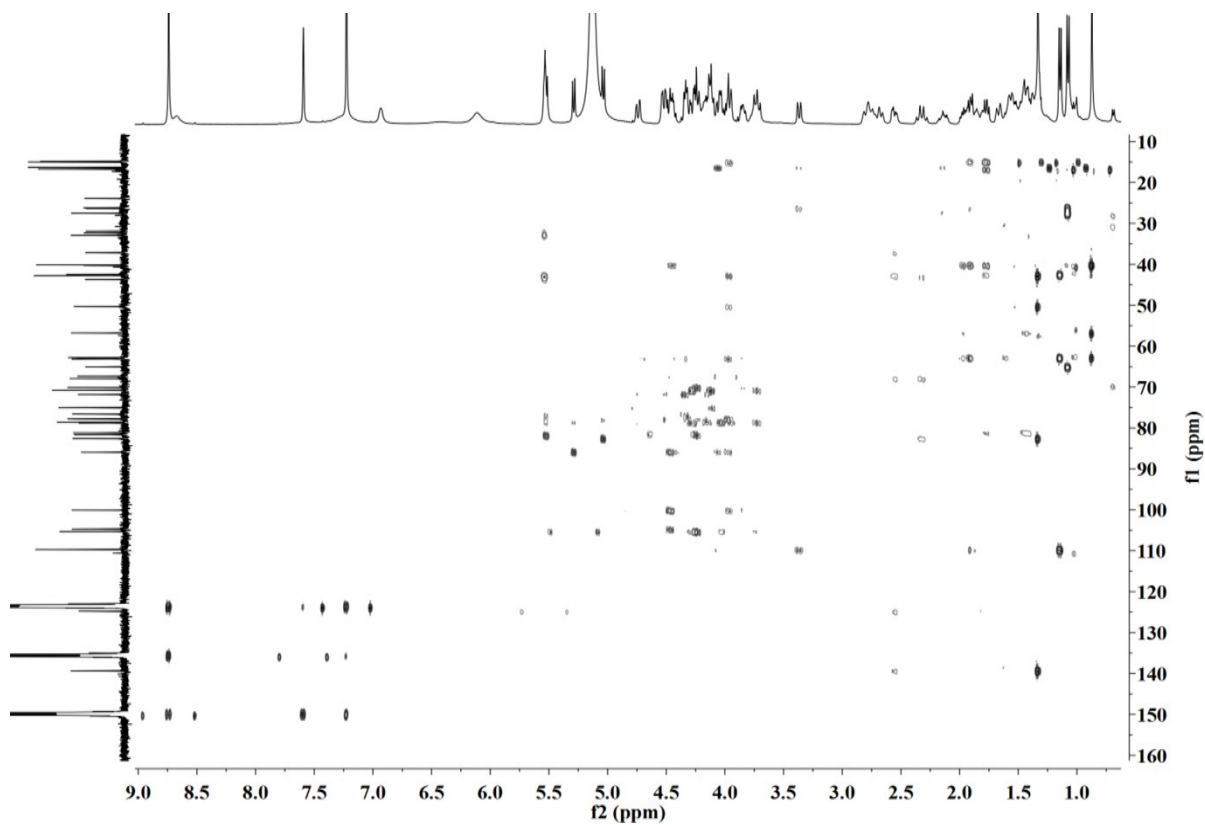

**Figure S5.** TOCSY NMR spectrum of compound **1** (pyridine- $d_5$ )

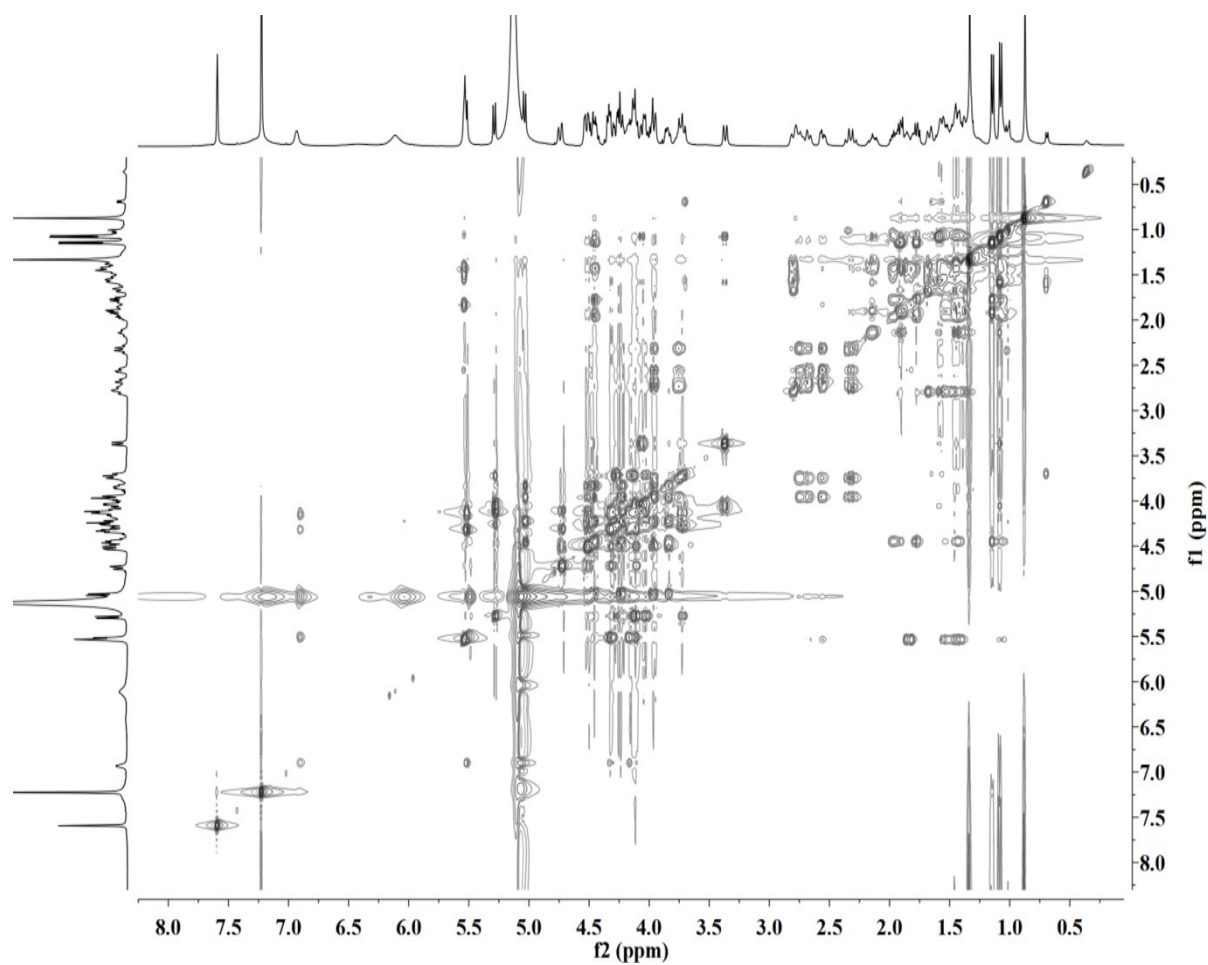

**Figure S6.** ESI-Q-TOF-MS spectrum of compound **1**

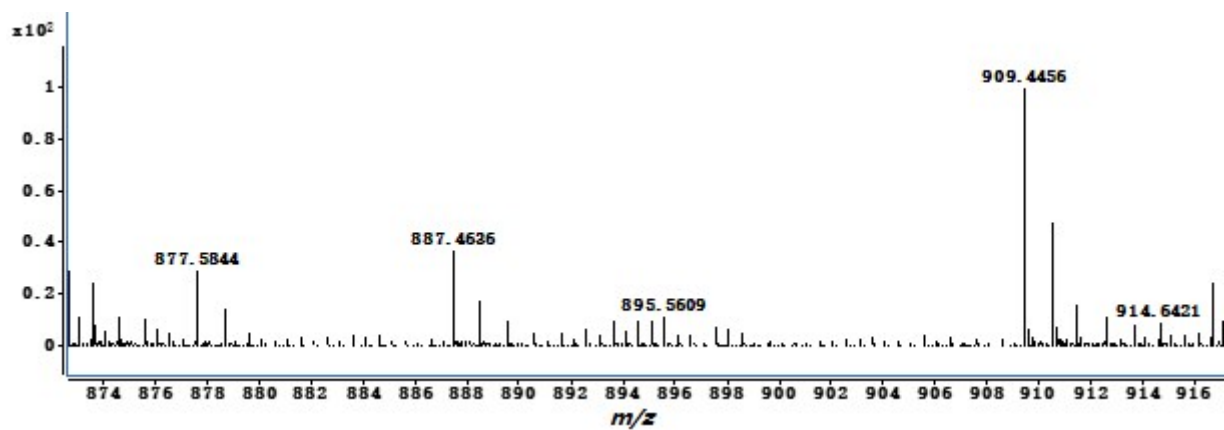

Figure S7. IR (KBr, disc) spectrum of compound 1

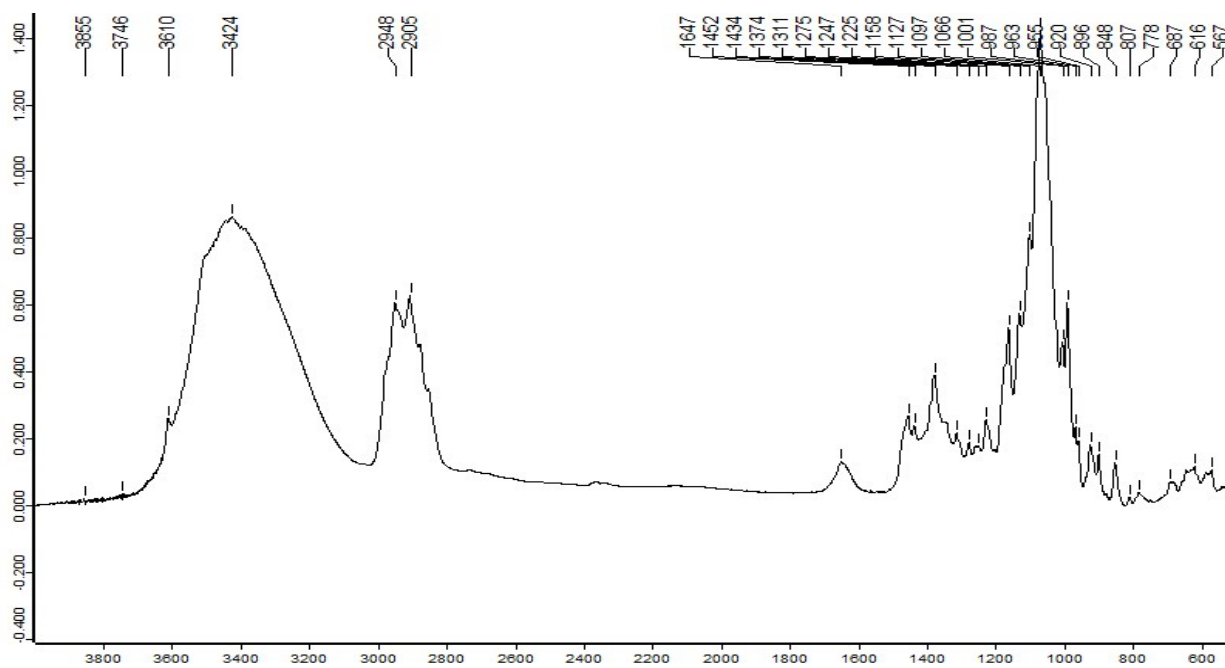

Figure S8. <sup>1</sup>H NMR spectrum of compound 2 (pyridine-*d*<sub>5</sub>)

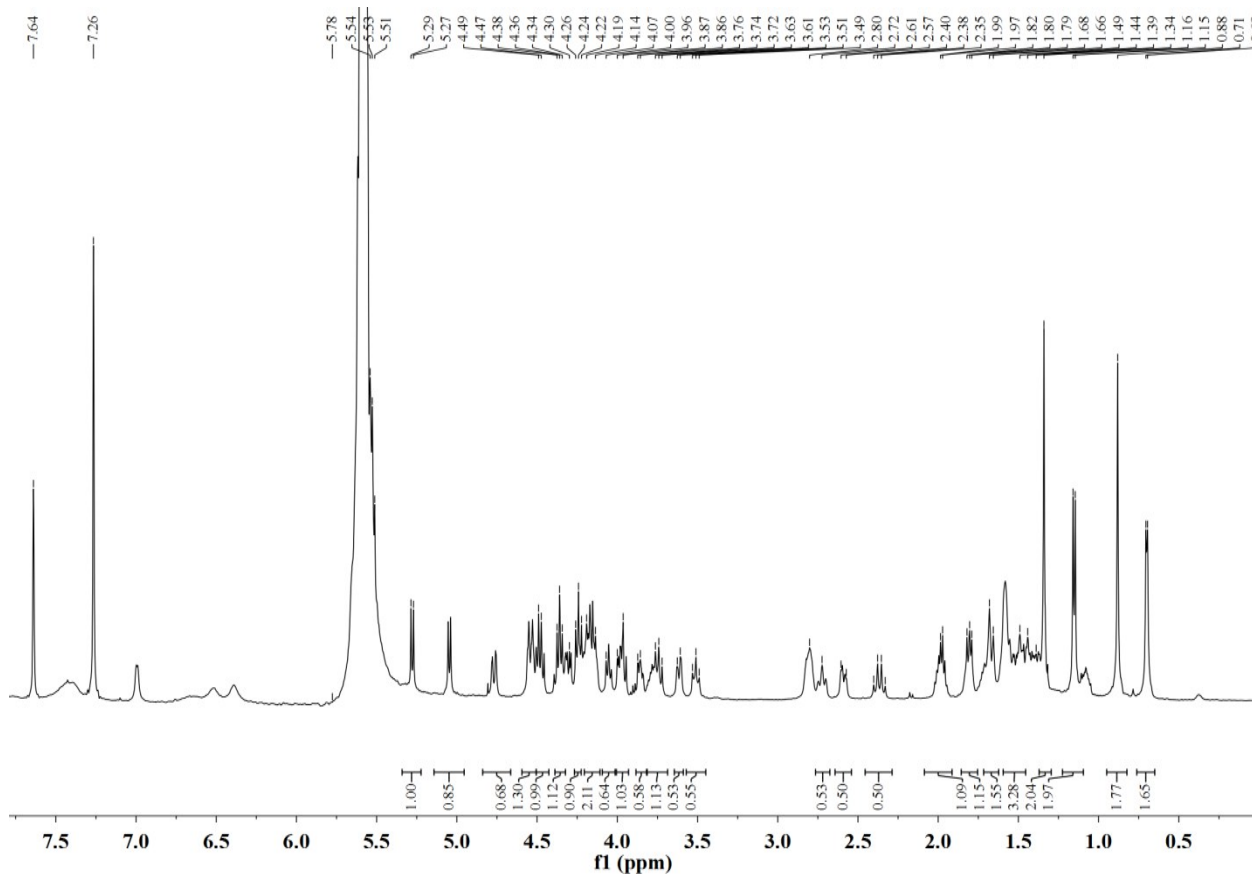

Figure S9.  $^{13}\text{C}$  NMR spectrum of compound 2 (pyridine- $d_5$ )

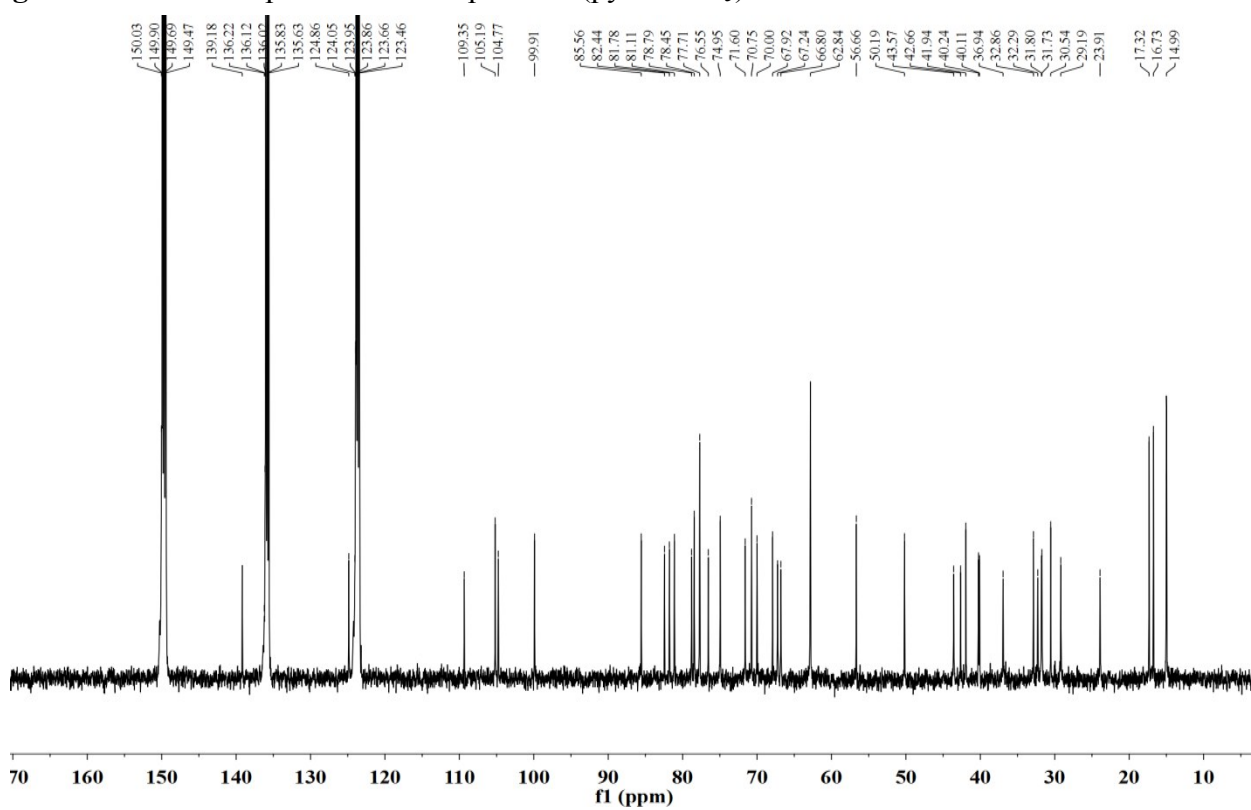

Figure S10. HSQC NMR spectrum of compound 2 (pyridine- $d_5$ )

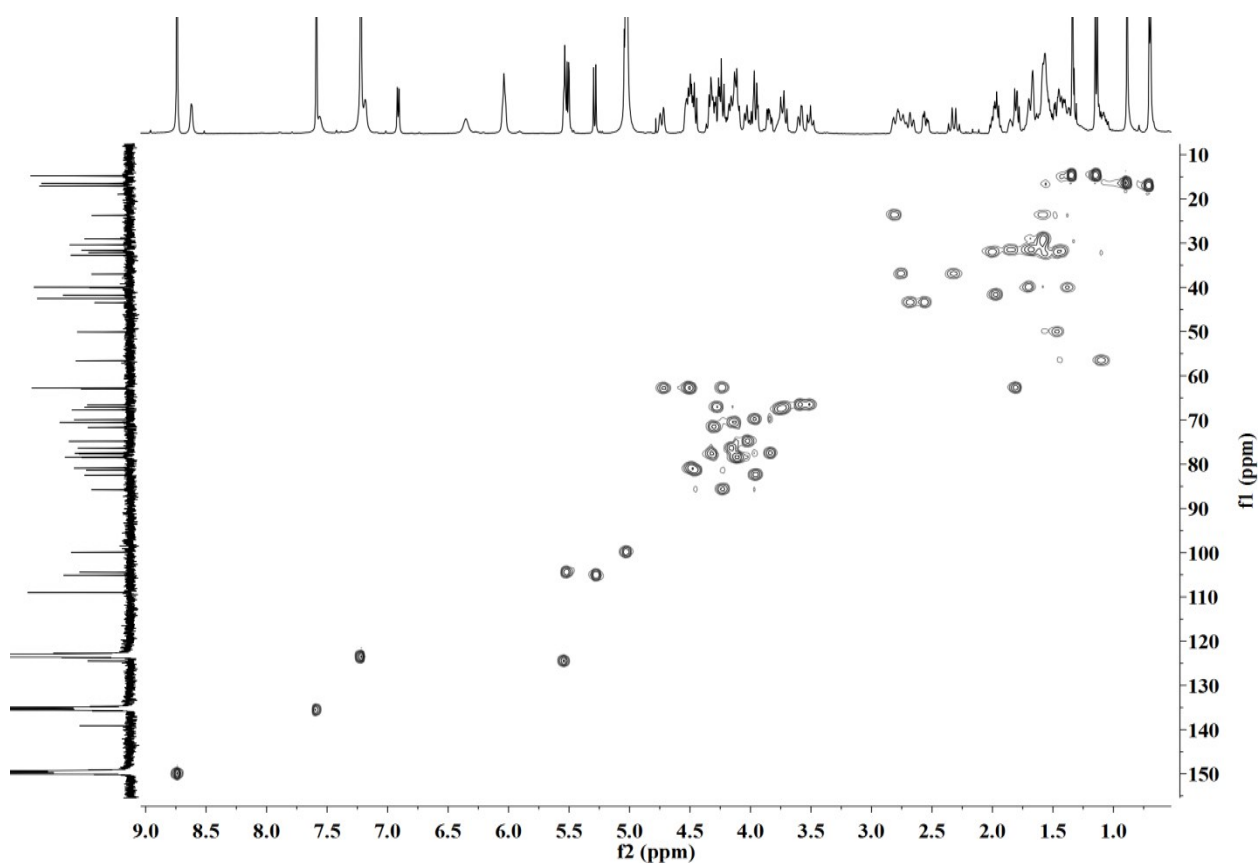



**Figure S11.** HMBC NMR spectrum of compound **2** (pyridine-*d*<sub>5</sub>)

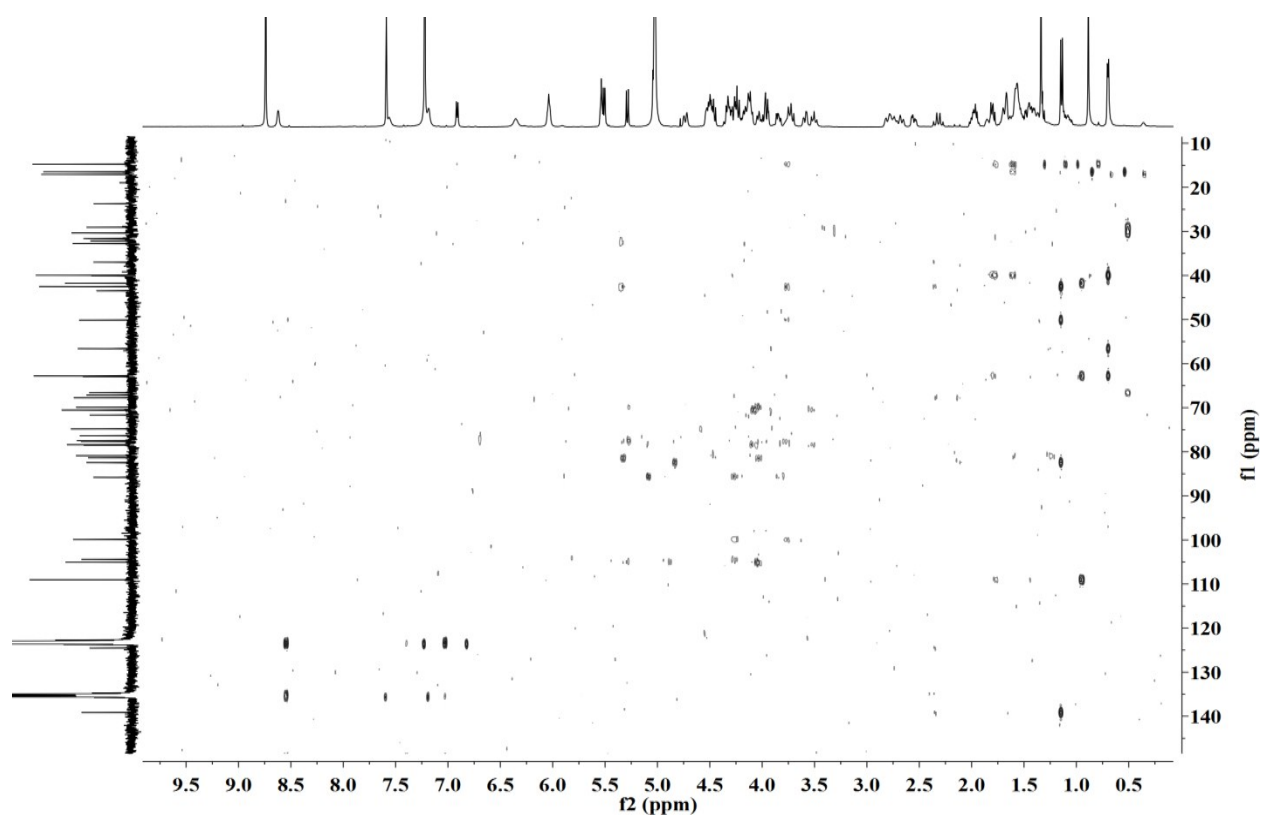

**Figure S12.** TOCSY NMR spectrum of compound **2** (pyridine-*d*<sub>5</sub>)

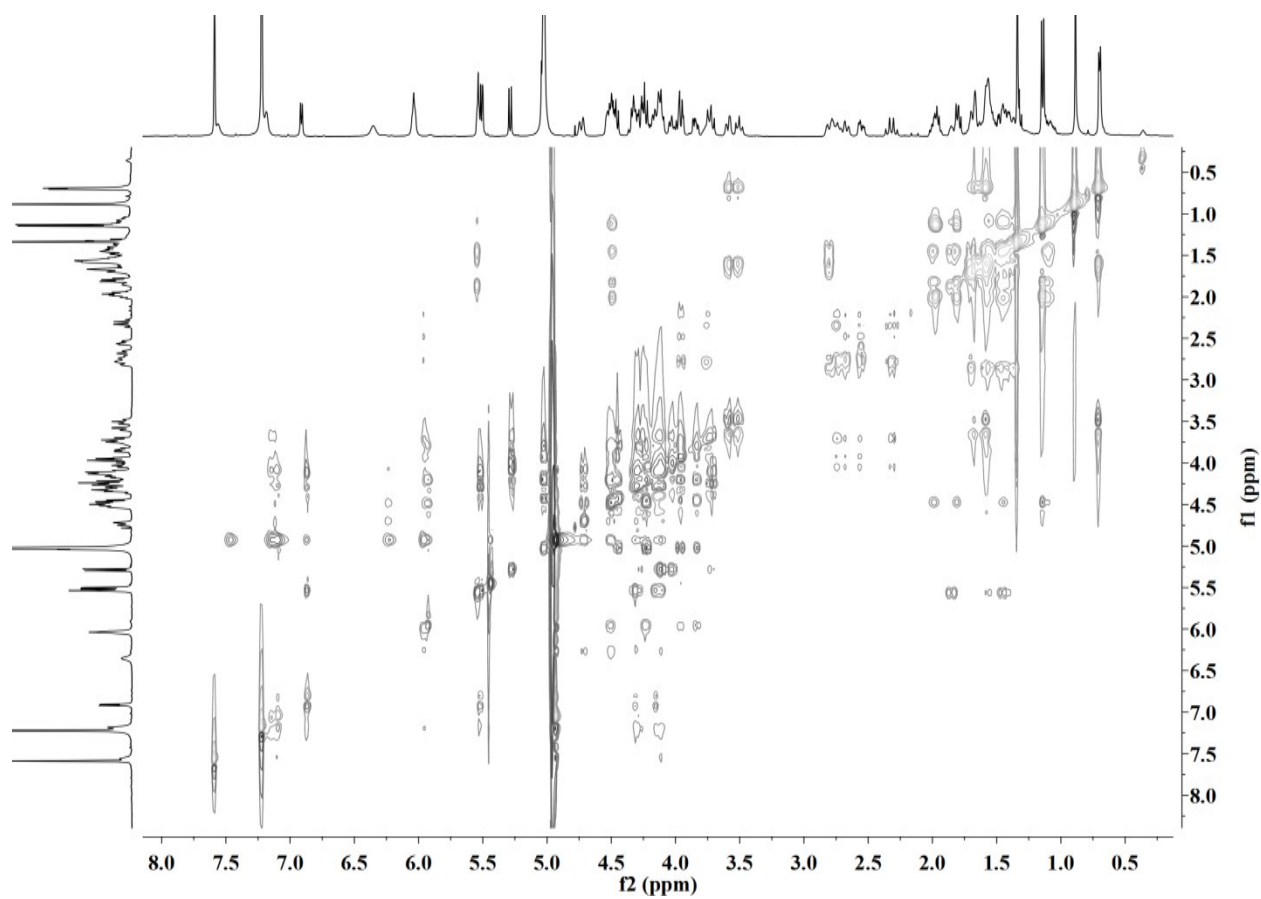

Figure S13. ESI-Q-TOF-MS spectrum of compound 2

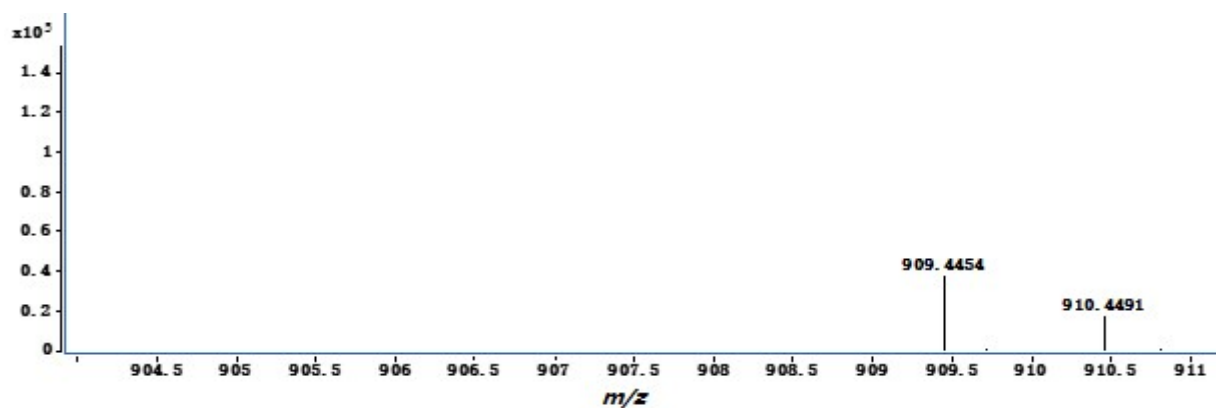

Figure S14. IR (KBr, disc) spectrum of compound 2

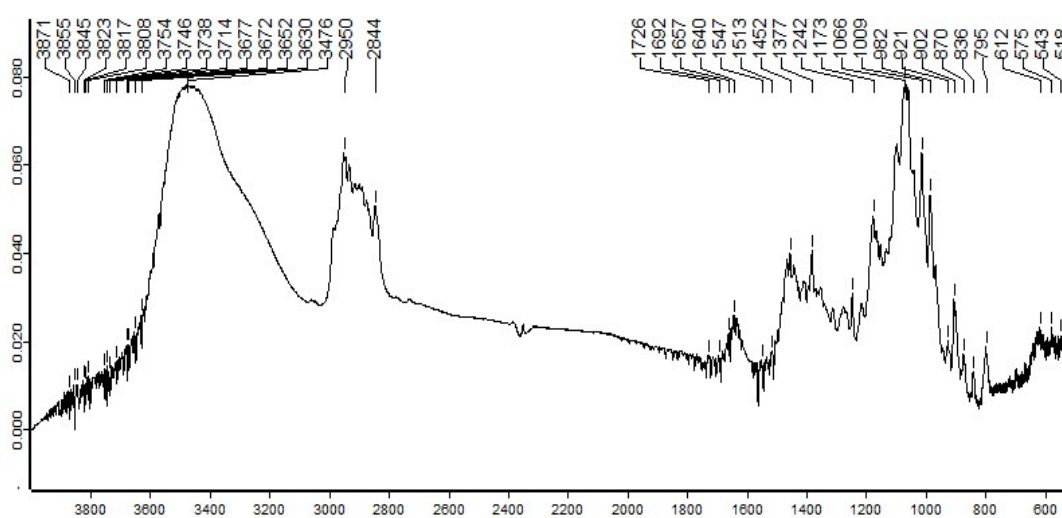

Figure S15.  $^1\text{H}$  NMR spectrum of compound 3 (pyridine- $d_5$ )

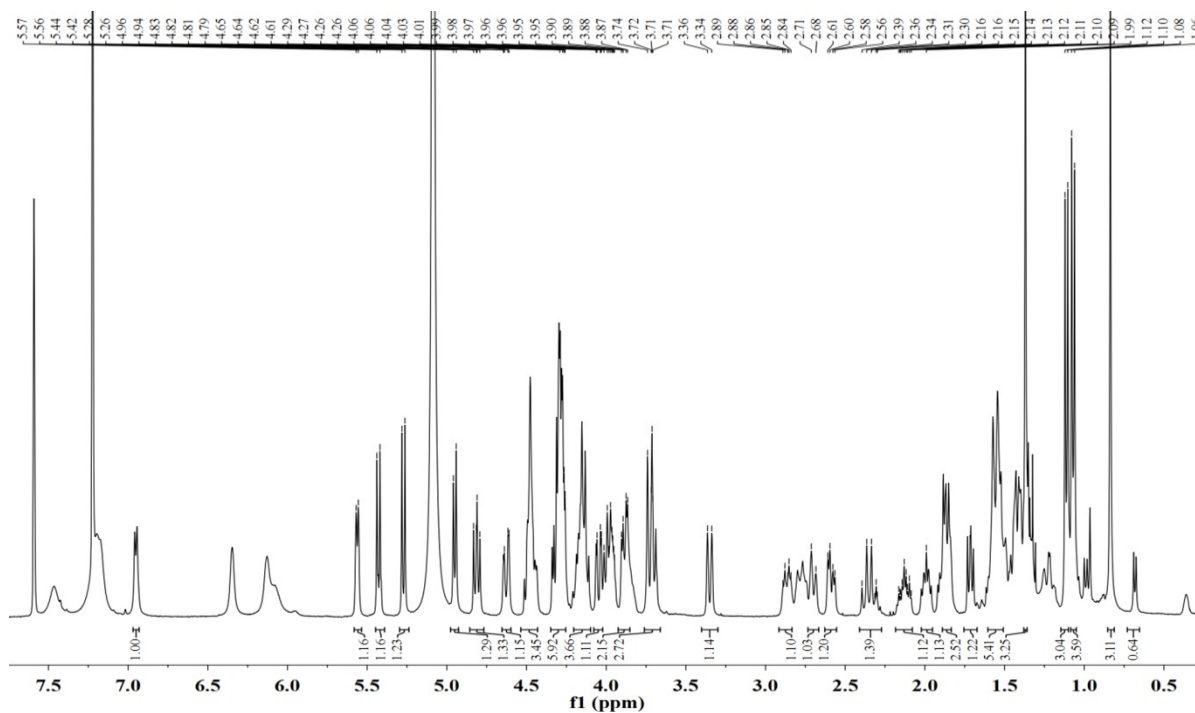

Figure S16.  $^{13}\text{C}$  NMR spectrum of compound 3 (pyridine- $d_5$ )

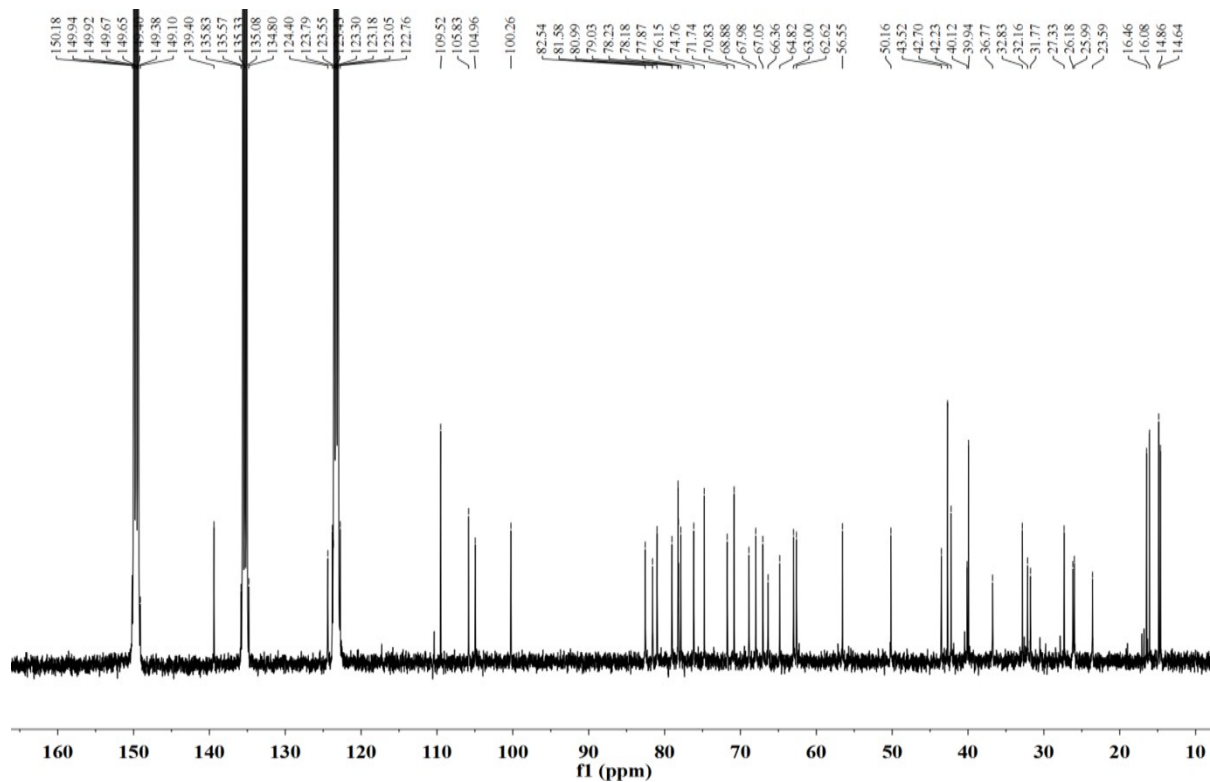

Figure S17. HSQC NMR spectrum of compound 3 (pyridine- $d_5$ )

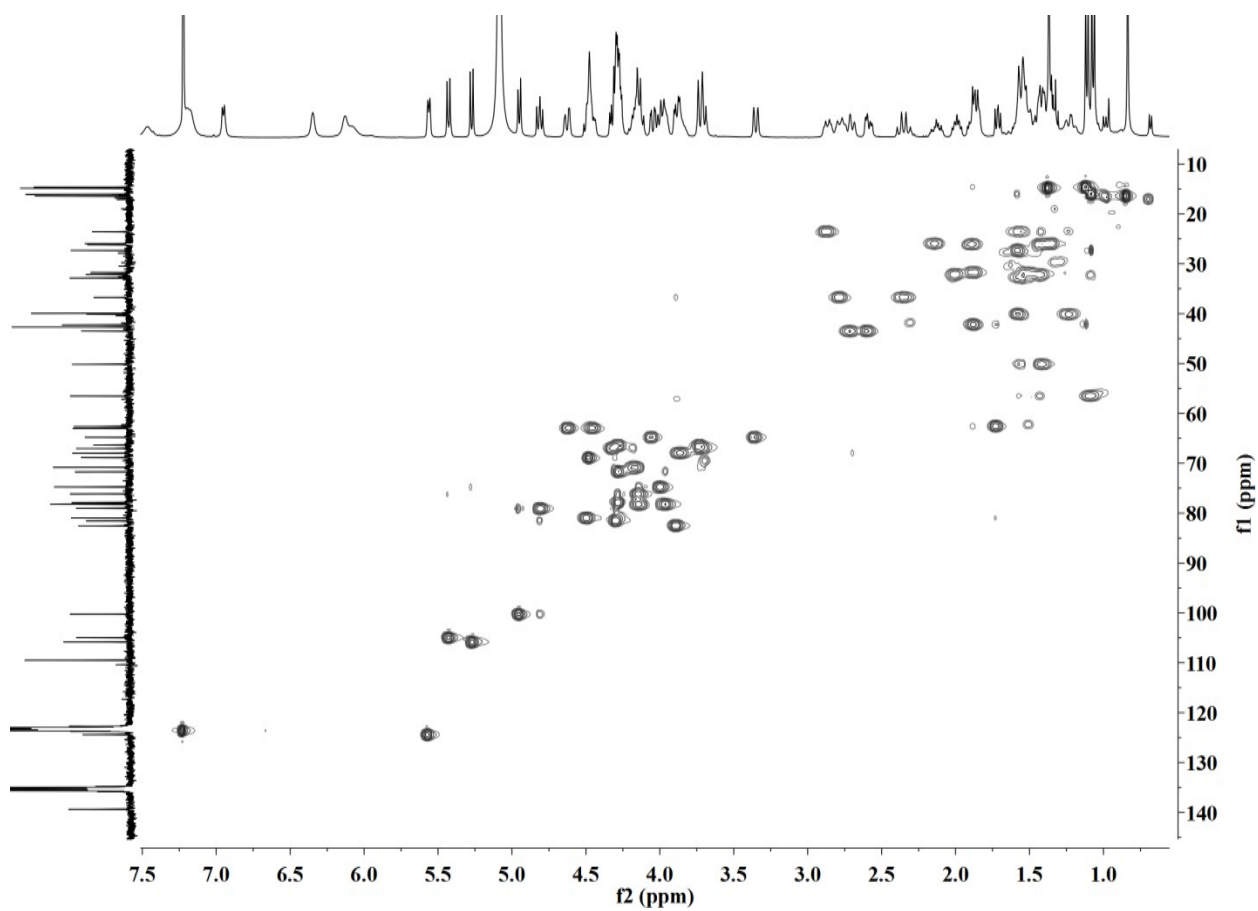

**Figure S18.** HMBC NMR spectrum of compound **3** (pyridine- $d_5$ )

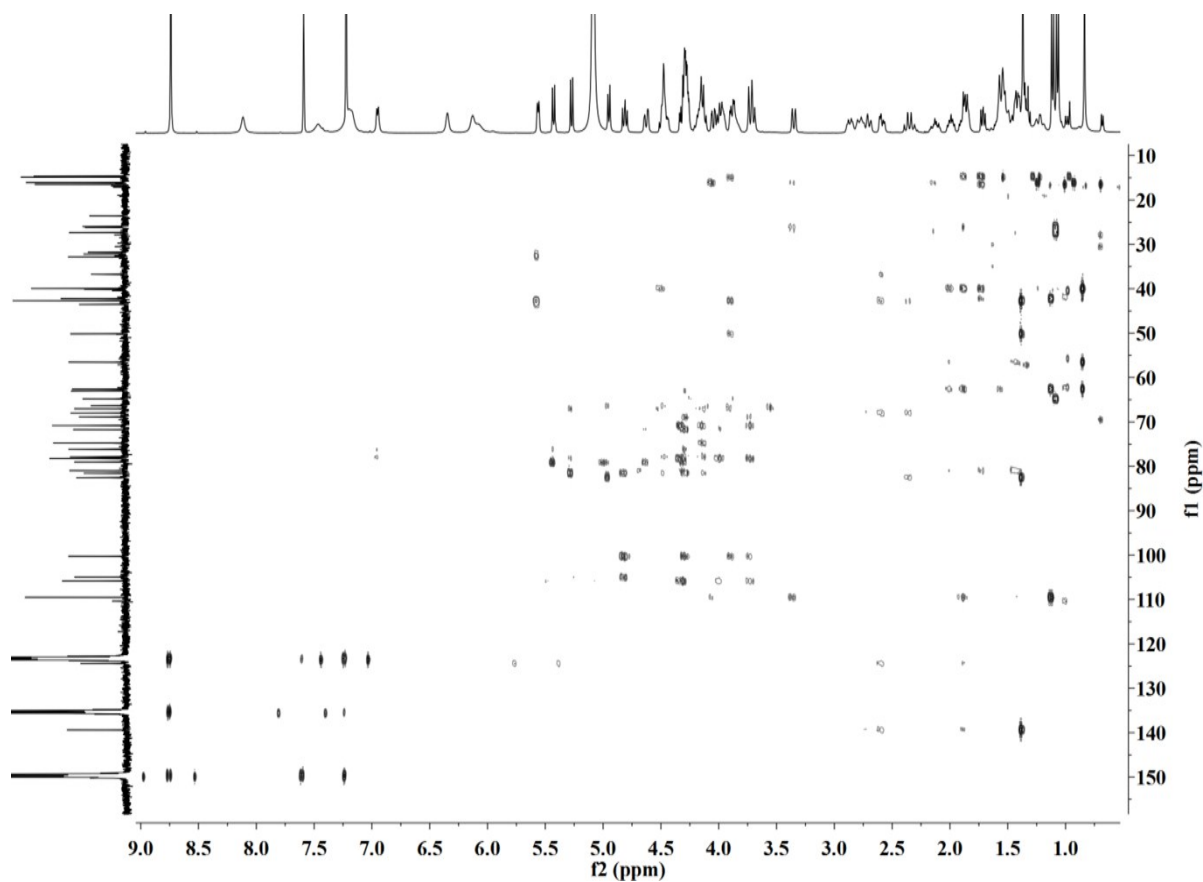

**Figure S19.** TOCSY NMR spectrum of compound **3** (pyridine- $d_5$ )

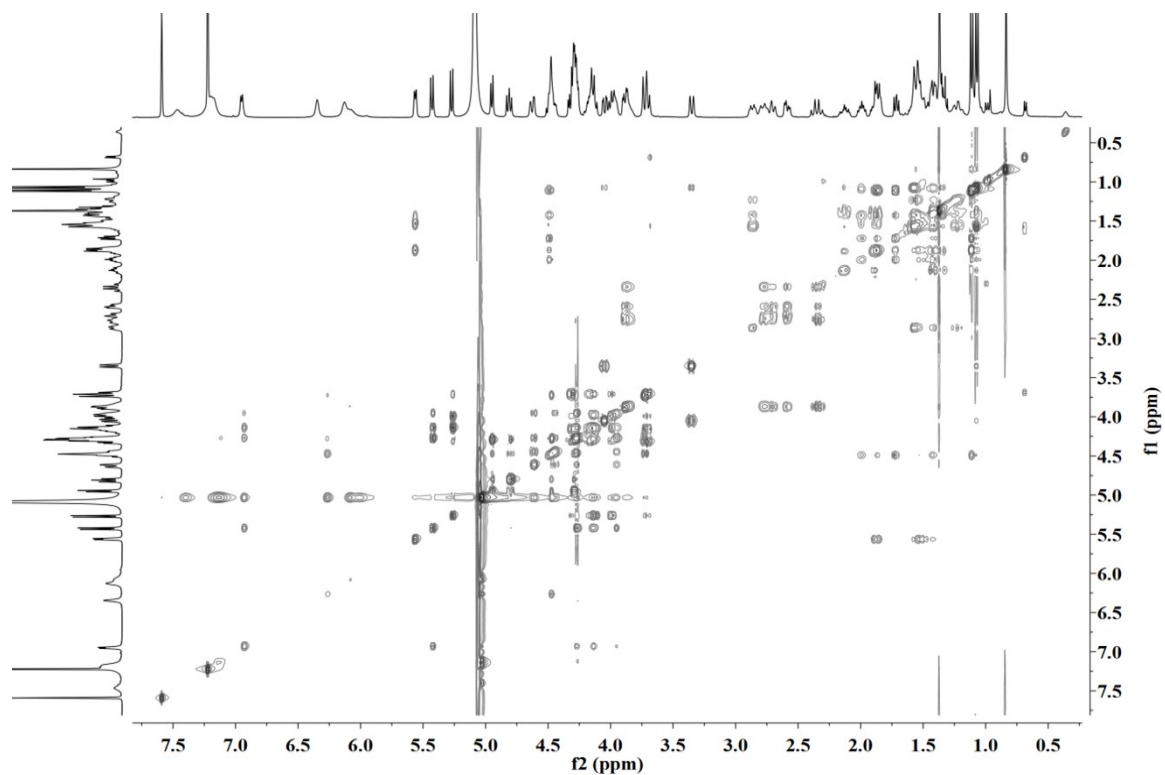

Figure S20. ESI-Q-TOF-MS spectrum of compound 3

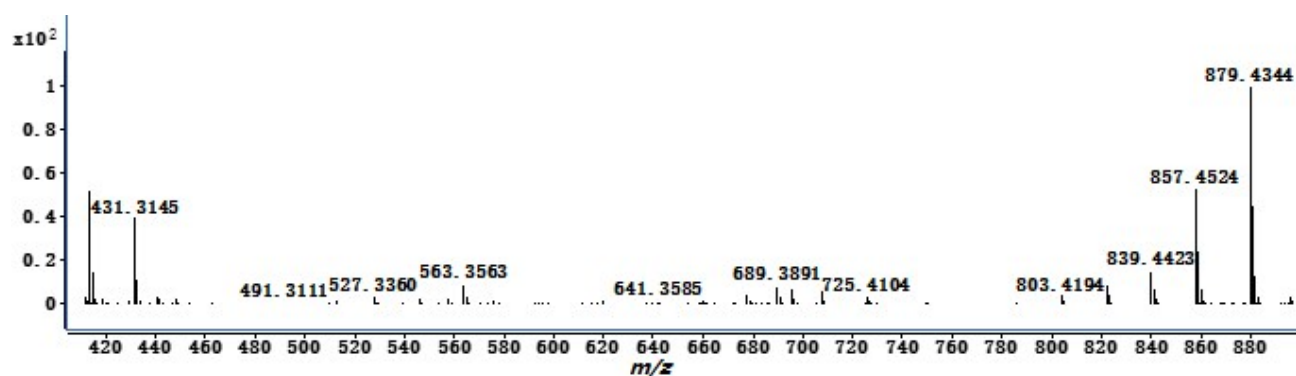

Figure S21. IR (KBr, disc) spectrum of compound 3

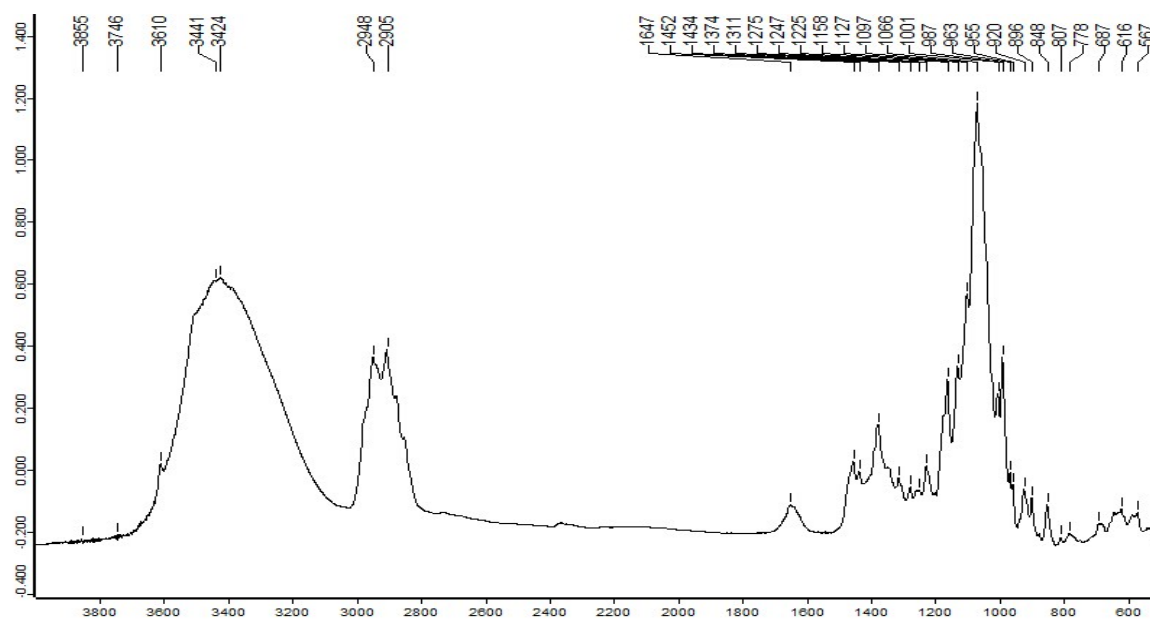

Figure S22.  $^1\text{H}$  NMR spectrum of compound 4 (pyridine- $d_5$ )

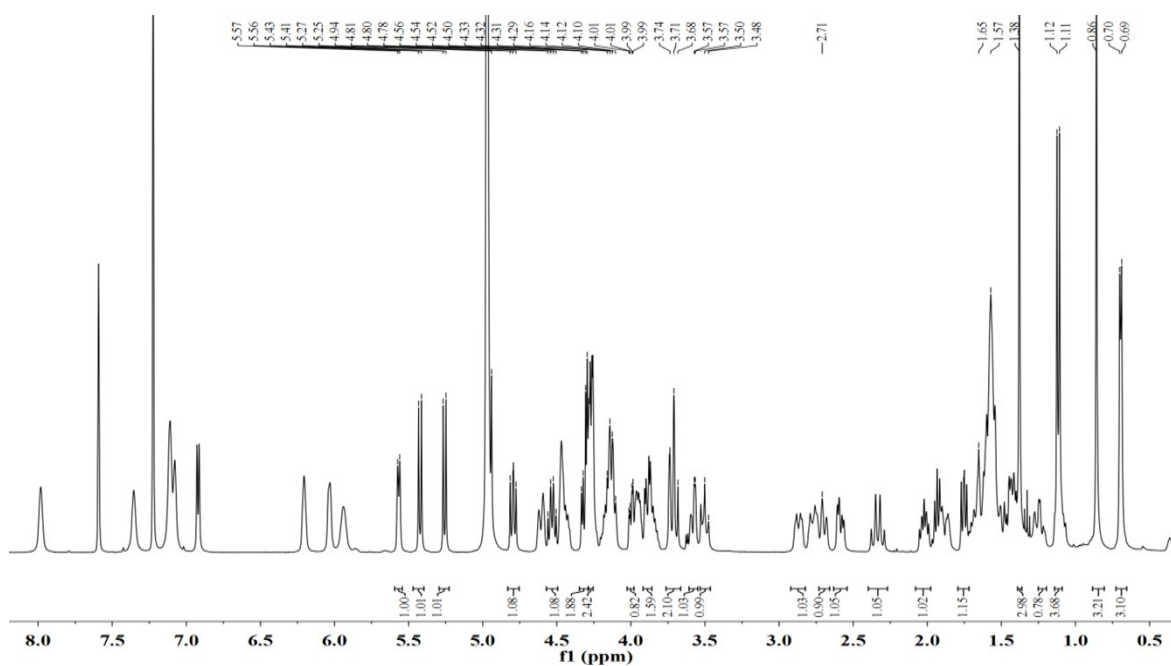

Figure S23.  $^{13}\text{C}$  NMR spectrum of compound 4 (pyridine- $d_5$ )

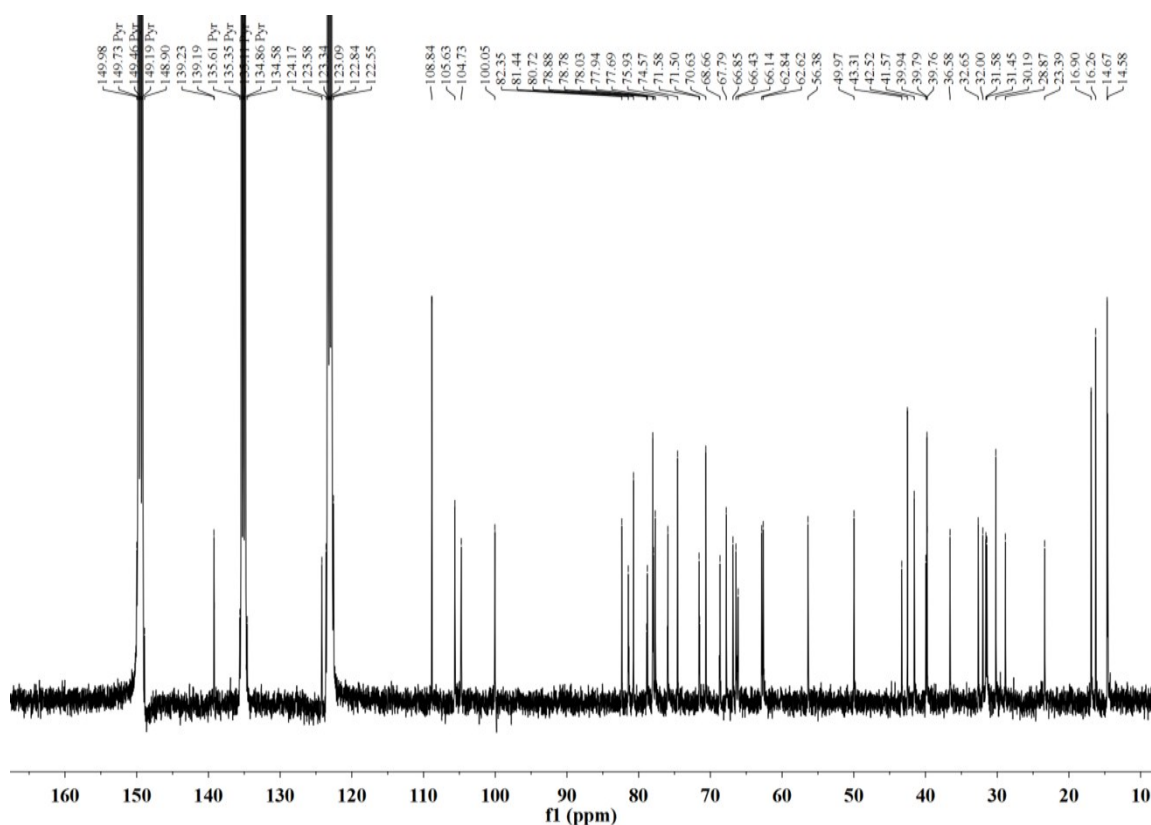

Figure S24. HSQC NMR spectrum of compound 4 (pyridine- $d_5$ )

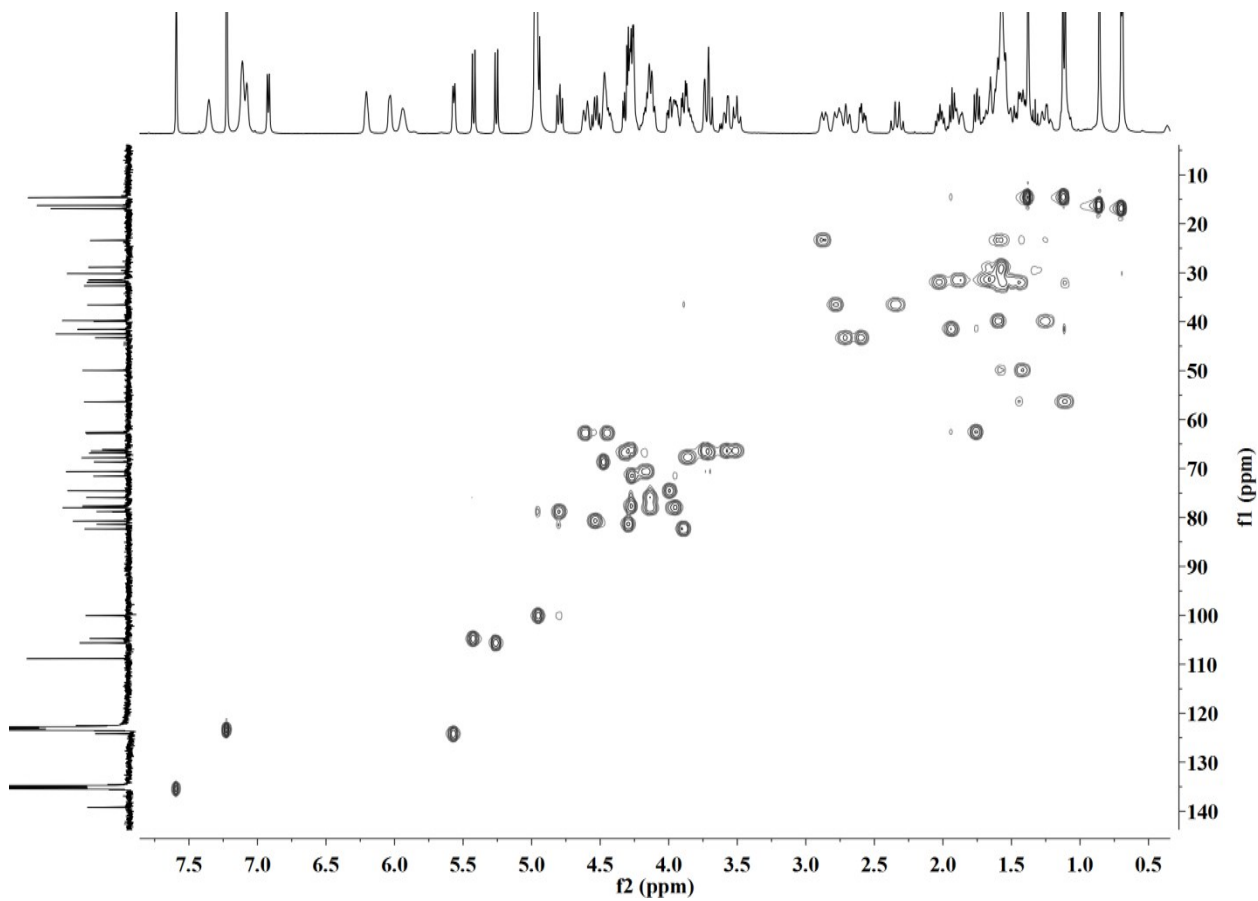

Figure S25. HMBC NMR spectrum of compound 4 (pyridine- $d_5$ )

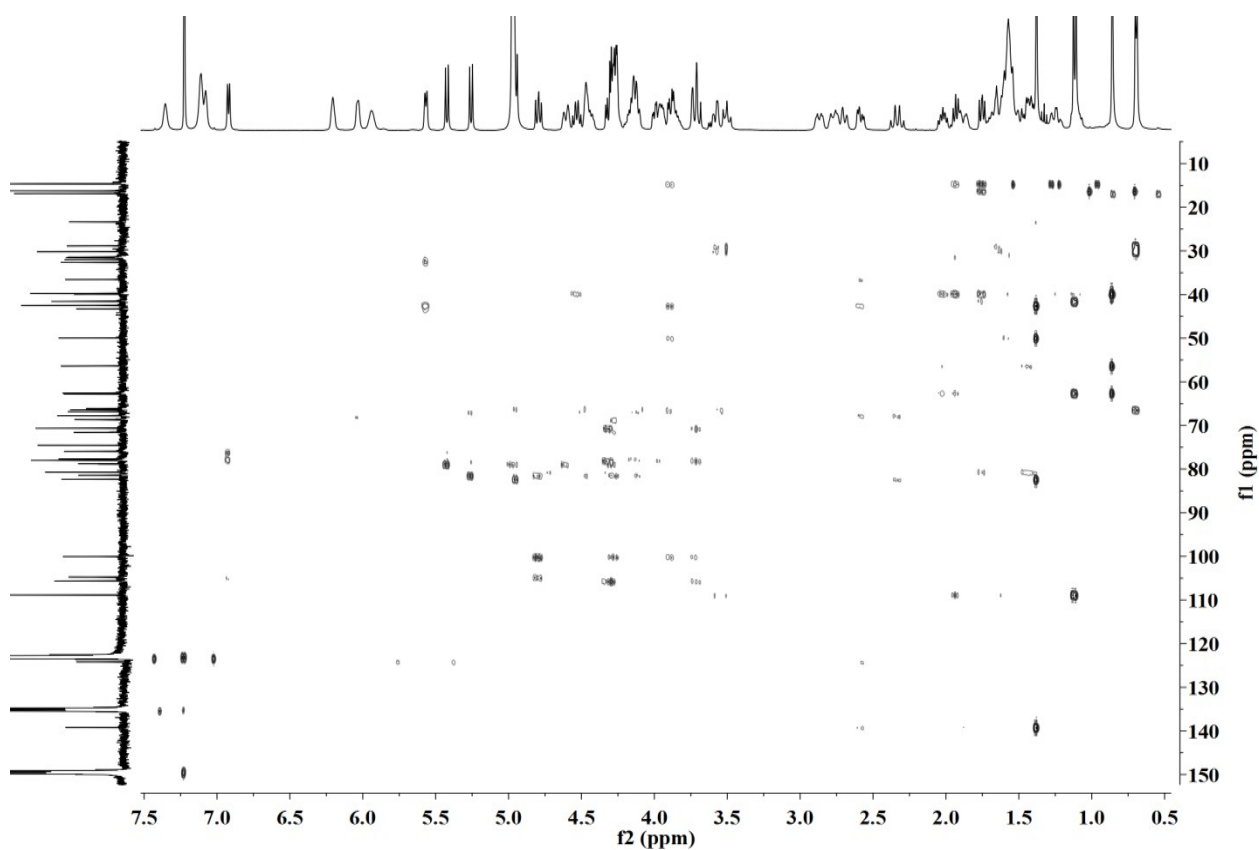

Figure S26. TOCSY NMR spectrum of compound 4 (pyridine- $d_5$ )

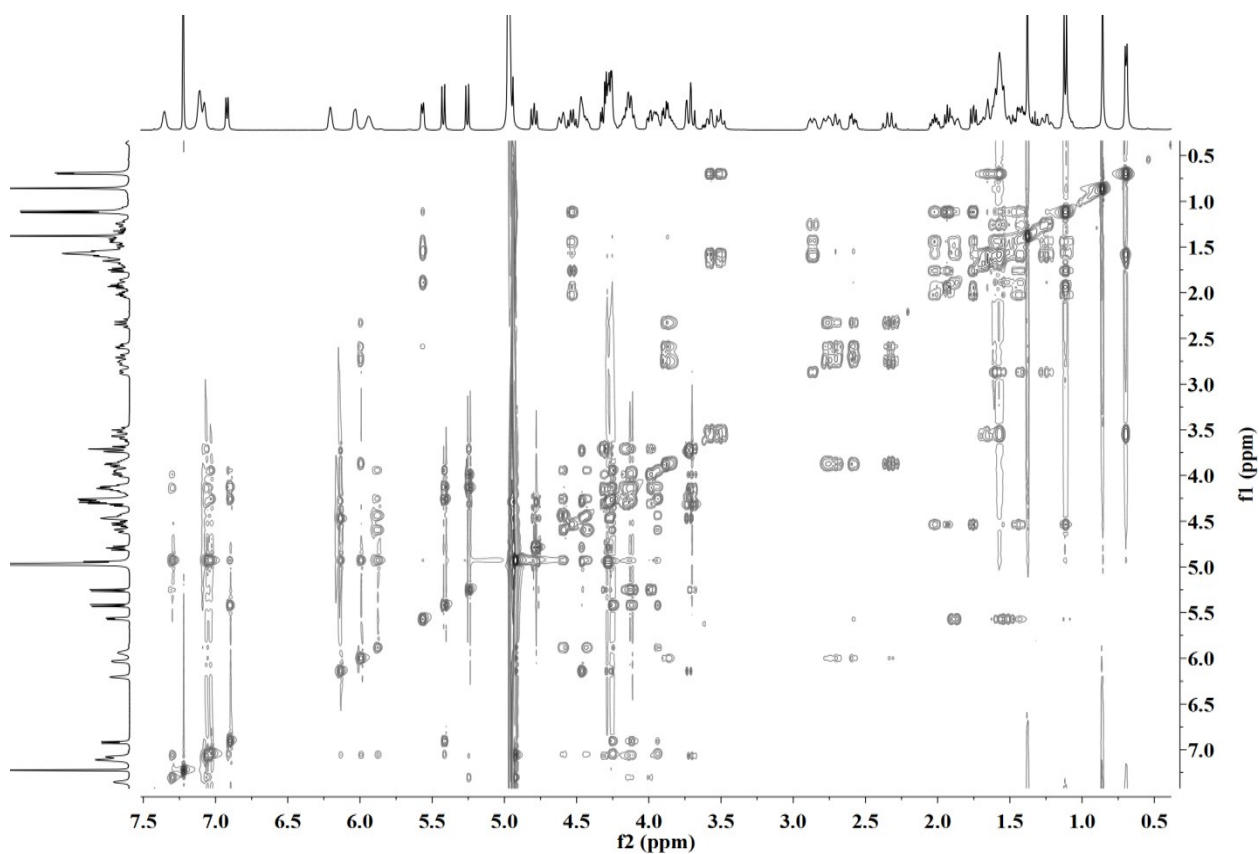

Figure S27. ESI-Q-TOF-MS spectrum of compound 4

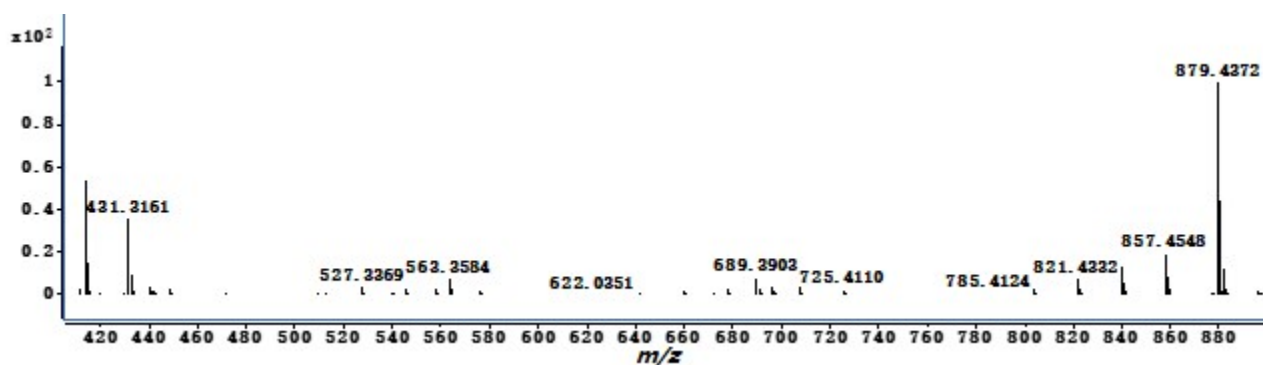

Figure S28. IR (KBr, disc) spectrum of compound 4

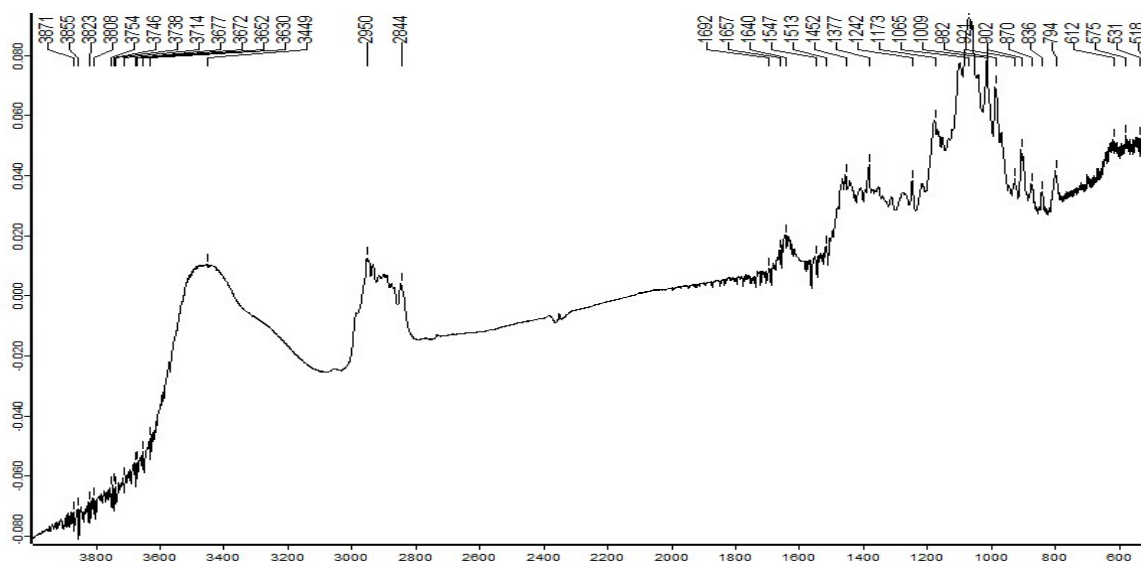

Figure S29.  $^1\text{H}$  NMR spectrum of compound 5 (pyridine- $d_5$ )

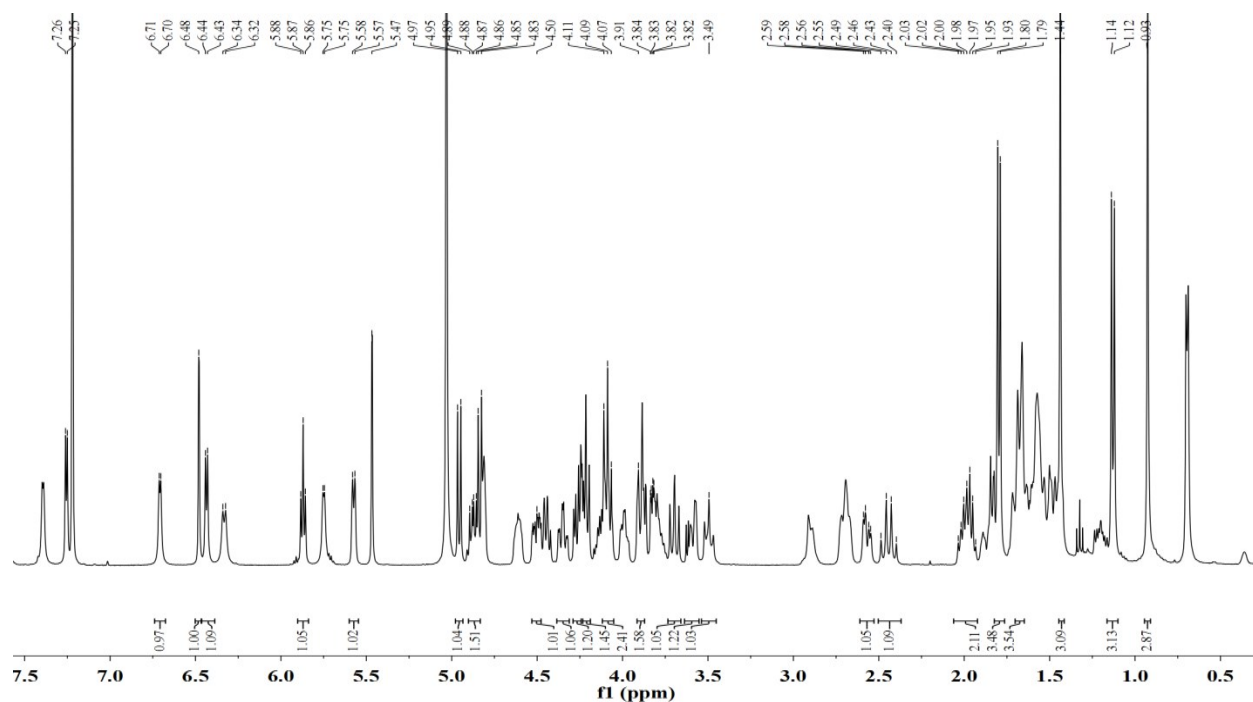



Figure S30.  $^{13}\text{C}$  NMR spectrum of compound **5** (pyridine- $d_5$ )

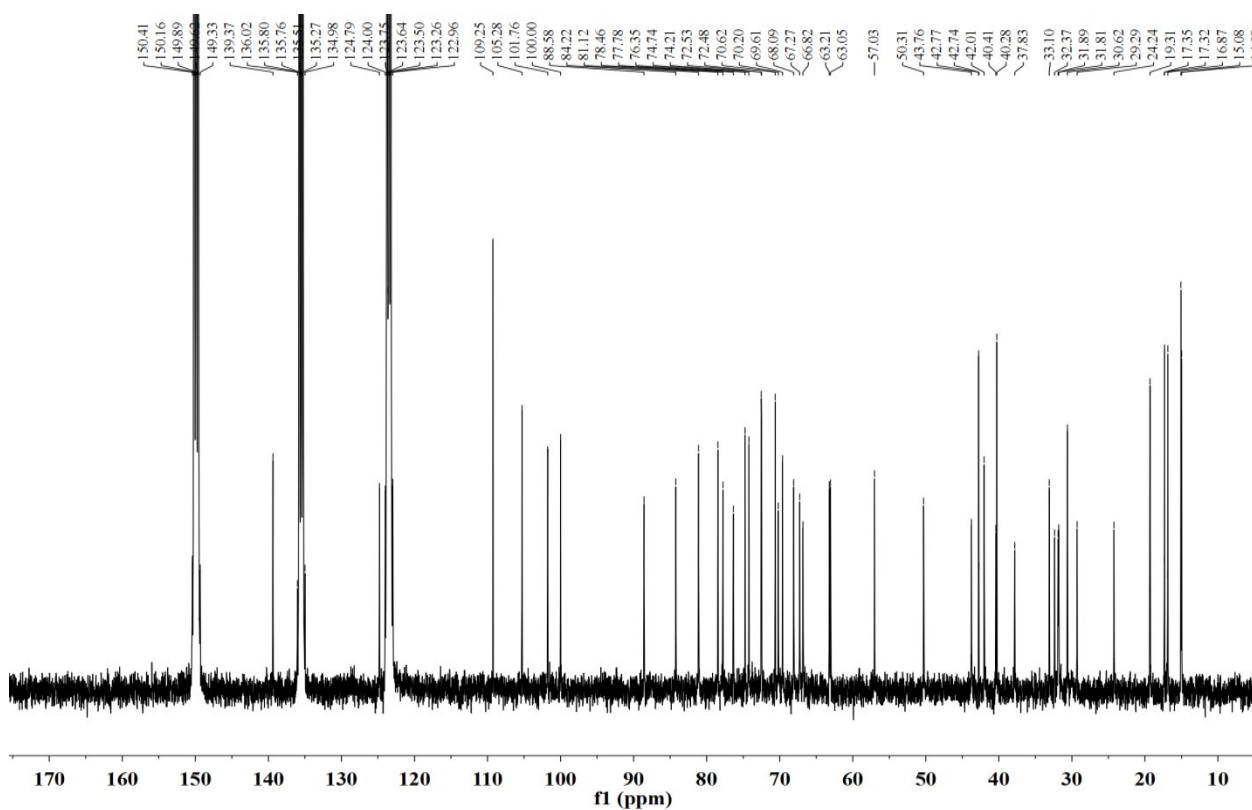

Figure S31. HSQC NMR spectrum of compound **5** (pyridine- $d_5$ )

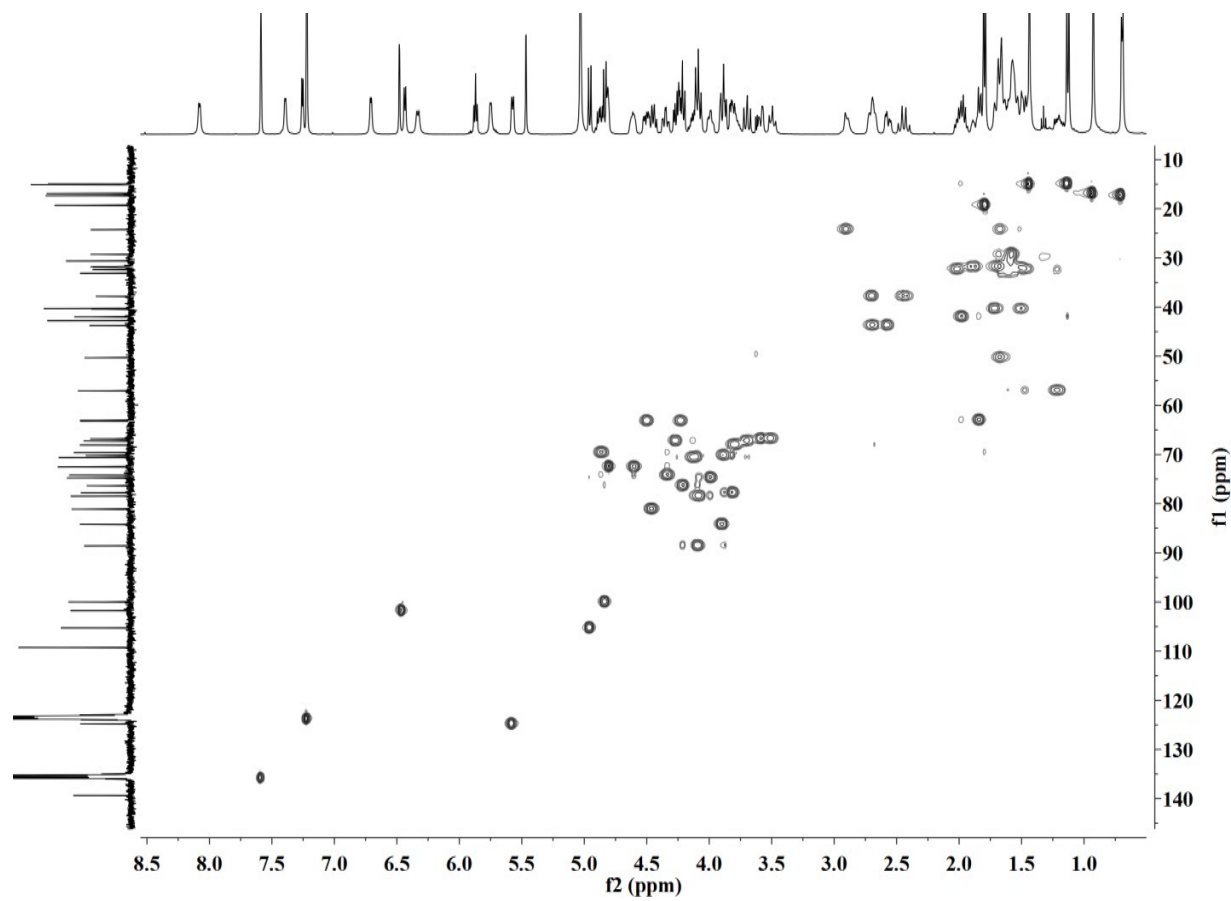

**Figure S32.** HMBC NMR spectrum of compound **5** (pyridine- $d_5$ )

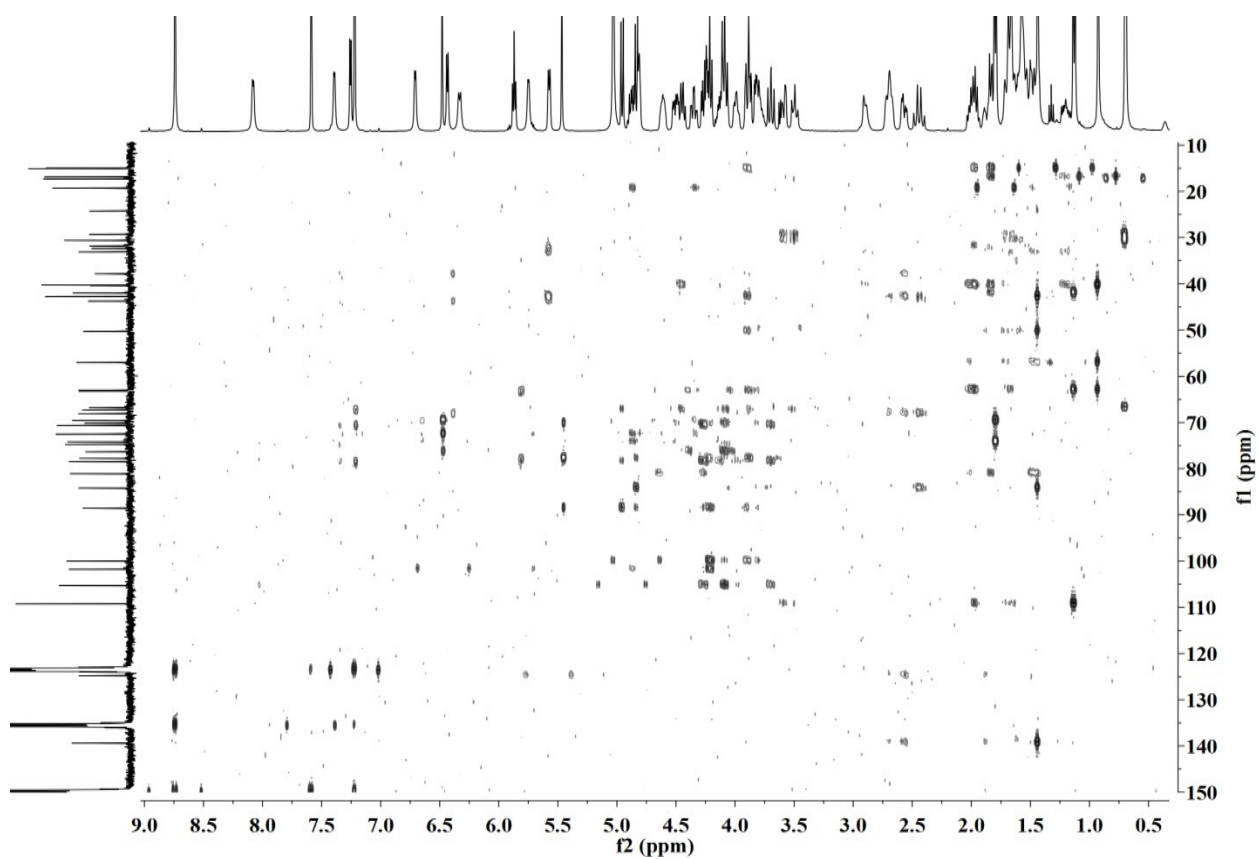

**Figure S33.** TOCSY NMR spectrum of compound **5** (pyridine- $d_5$ )

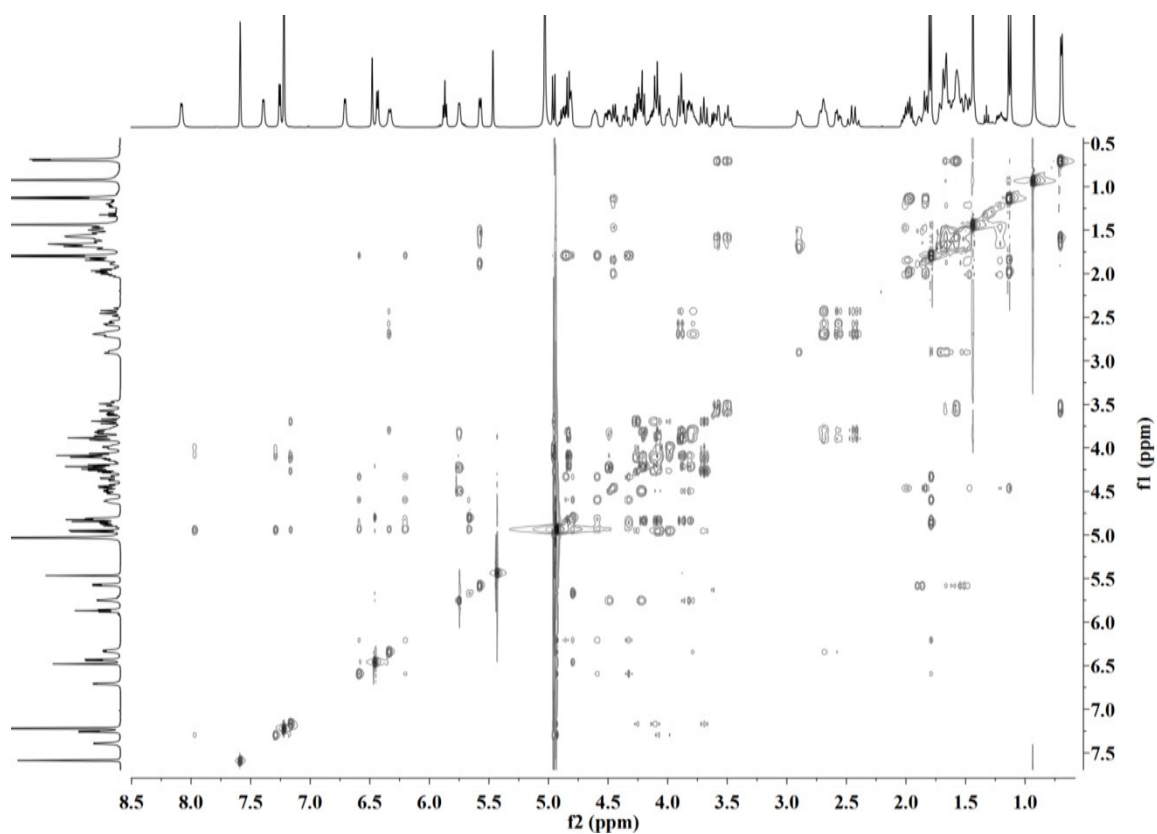

Figure S34. ESI-Q-TOF-MS spectrum of compound 5

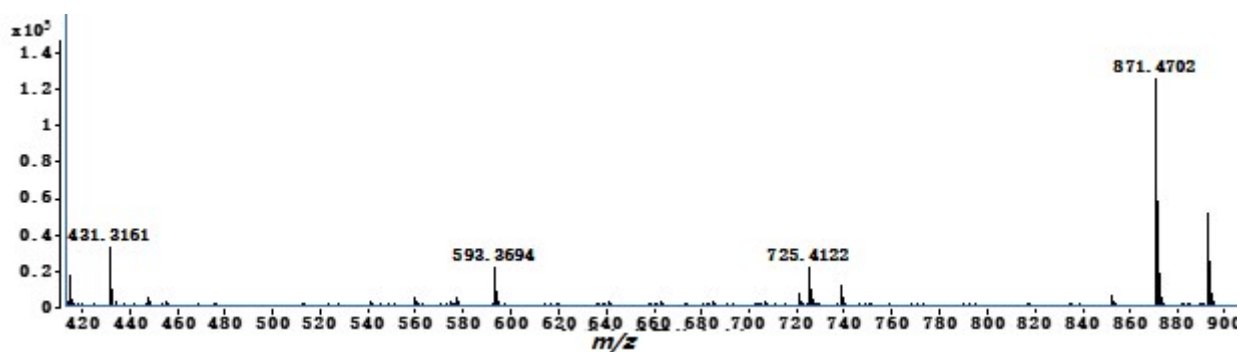

Figure S35. IR (KBr, disc) spectrum of compound 5

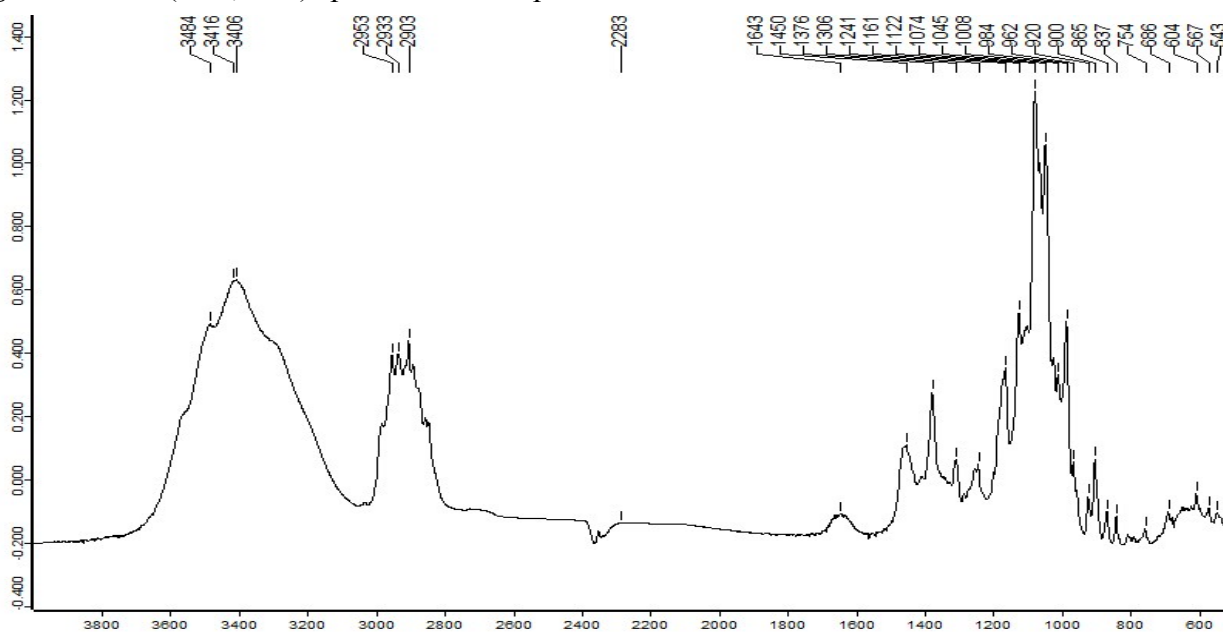

Figure S36.  $^1\text{H}$  NMR spectrum of compound 6 (pyridine- $d_5$ )

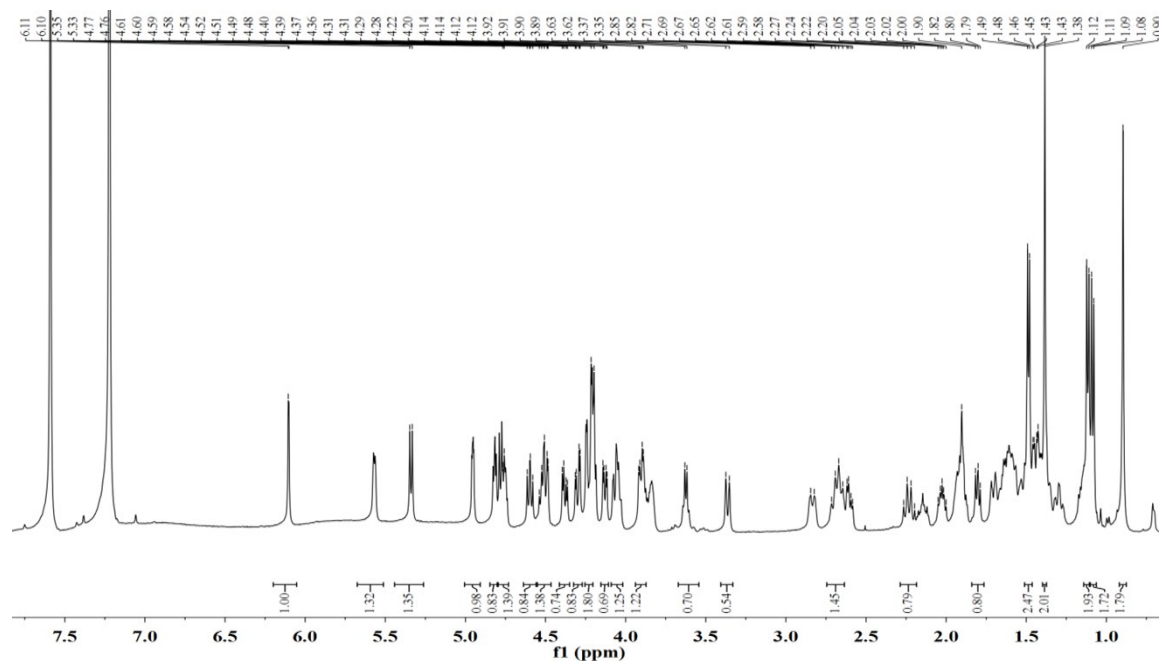

Figure S37.  $^{13}\text{C}$  NMR spectrum of compound **6** (pyridine- $d_5$ )

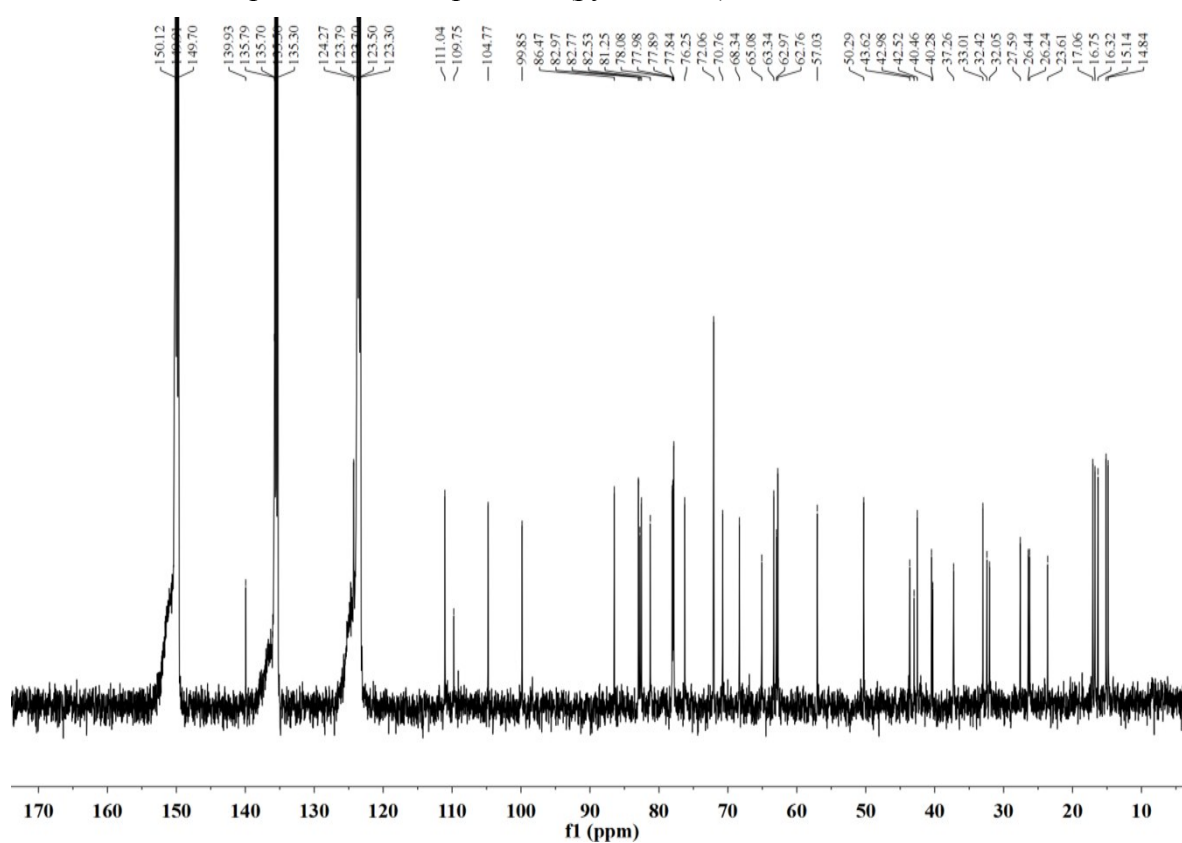

Figure S38. HSQC NMR spectrum of compound **6** (pyridine- $d_5$ )

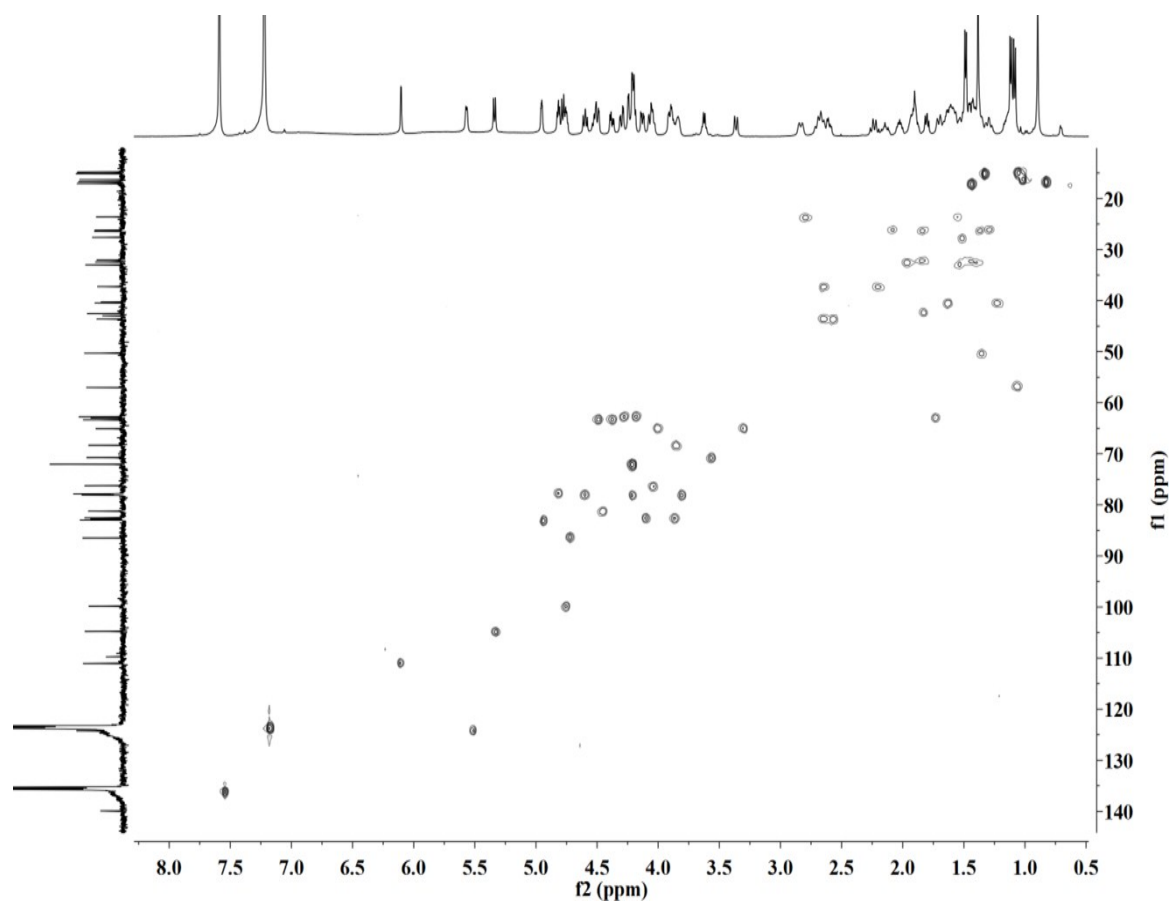

Figure S39. HMBC NMR spectrum of compound 6 (pyridine- $d_5$ )

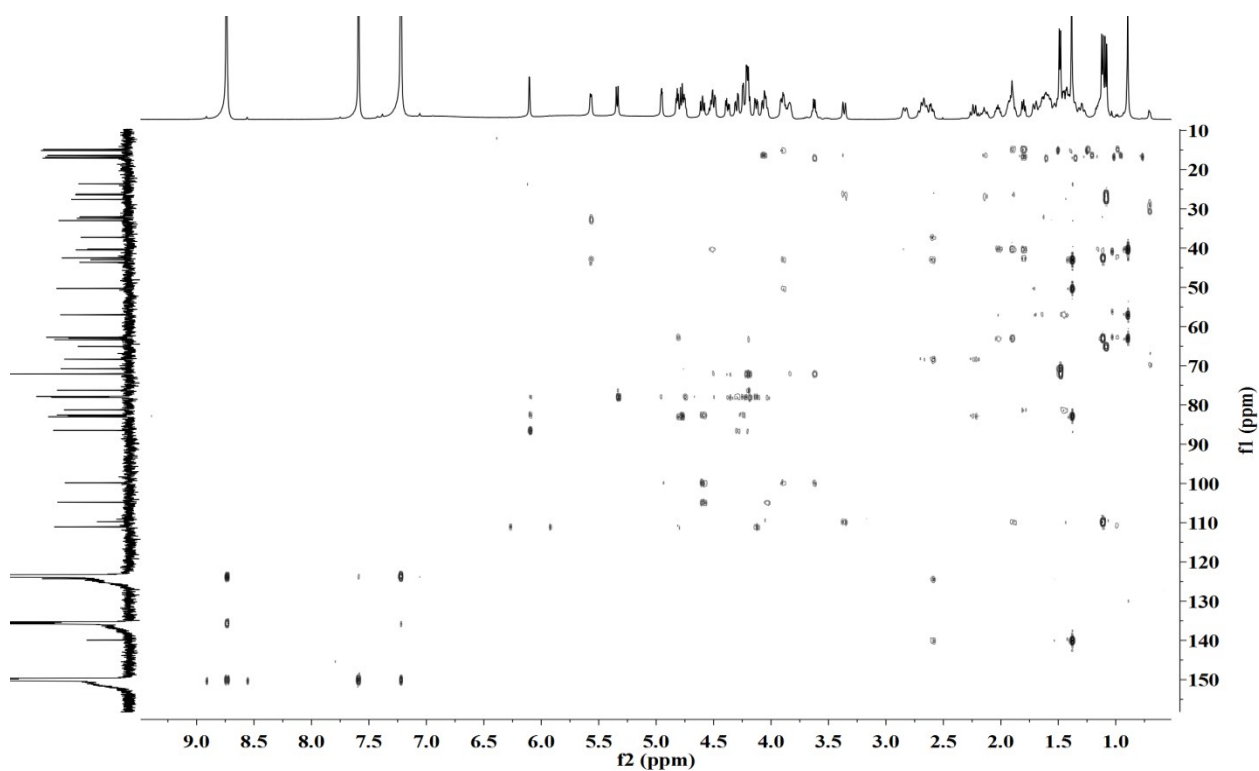

Figure S40. ESI-Q-TOF-MS spectrum of compound 6

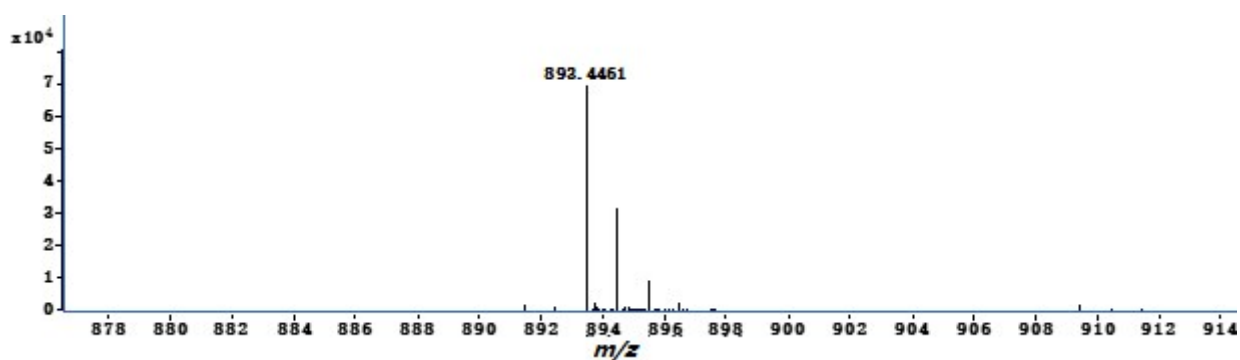

Figure S41. IR (KBr, disc) spectrum of compound 6

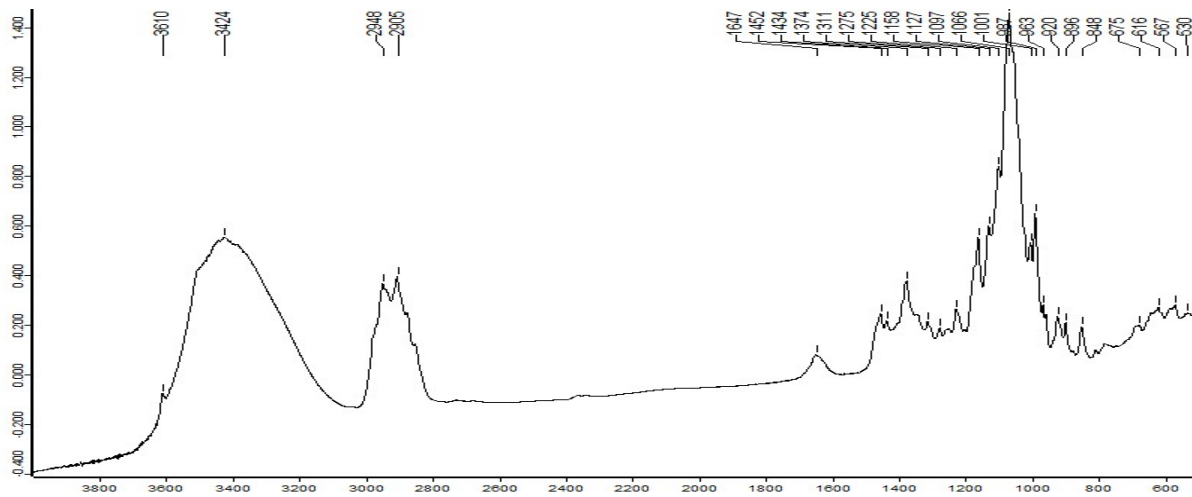

Figure S42.  $^1\text{H}$  NMR spectrum of compound 7 (pyridine- $d_5$ )

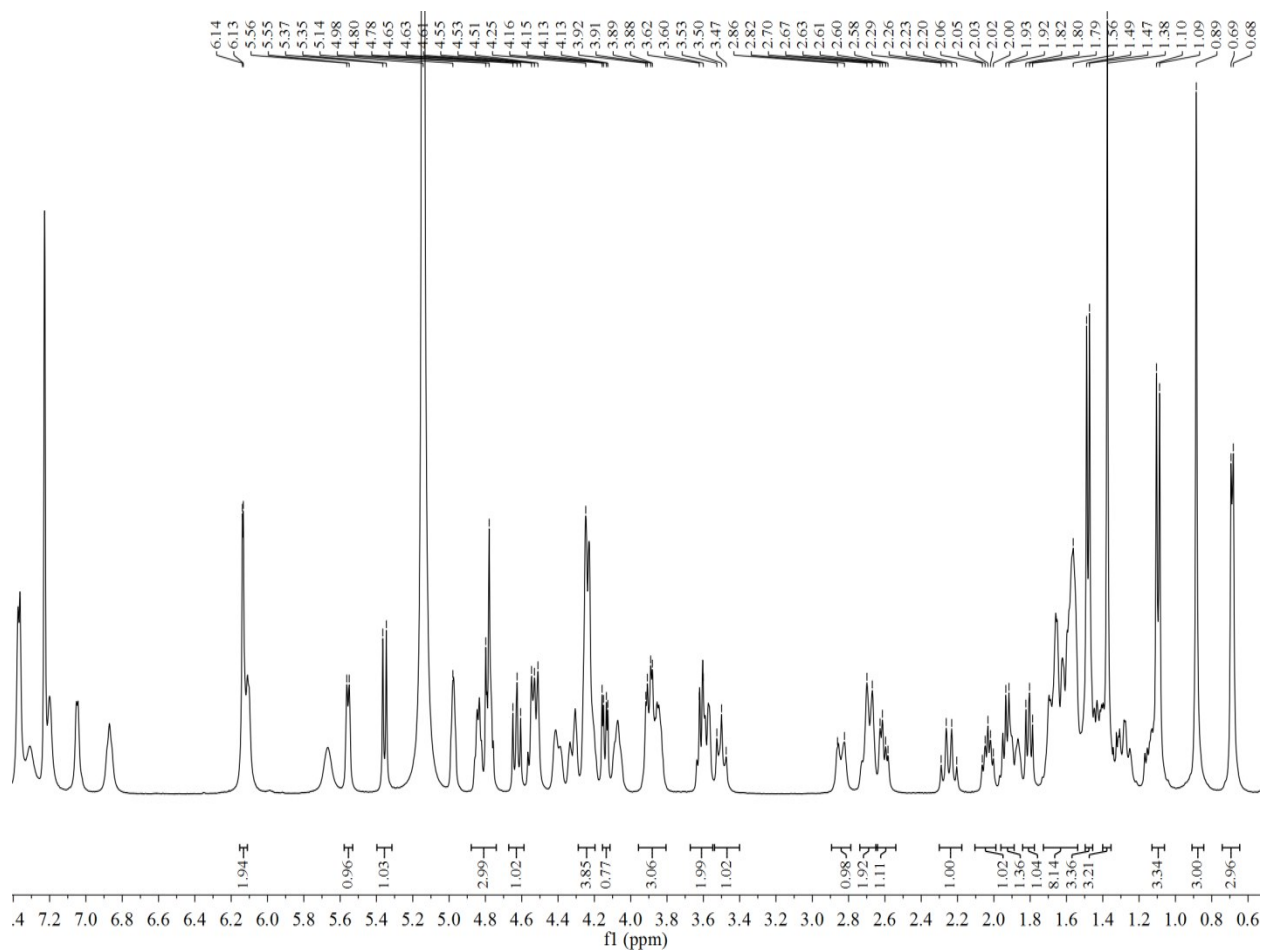

Figure S43.  $^{13}\text{C}$  NMR spectrum of compound 7 (pyridine- $d_5$ )

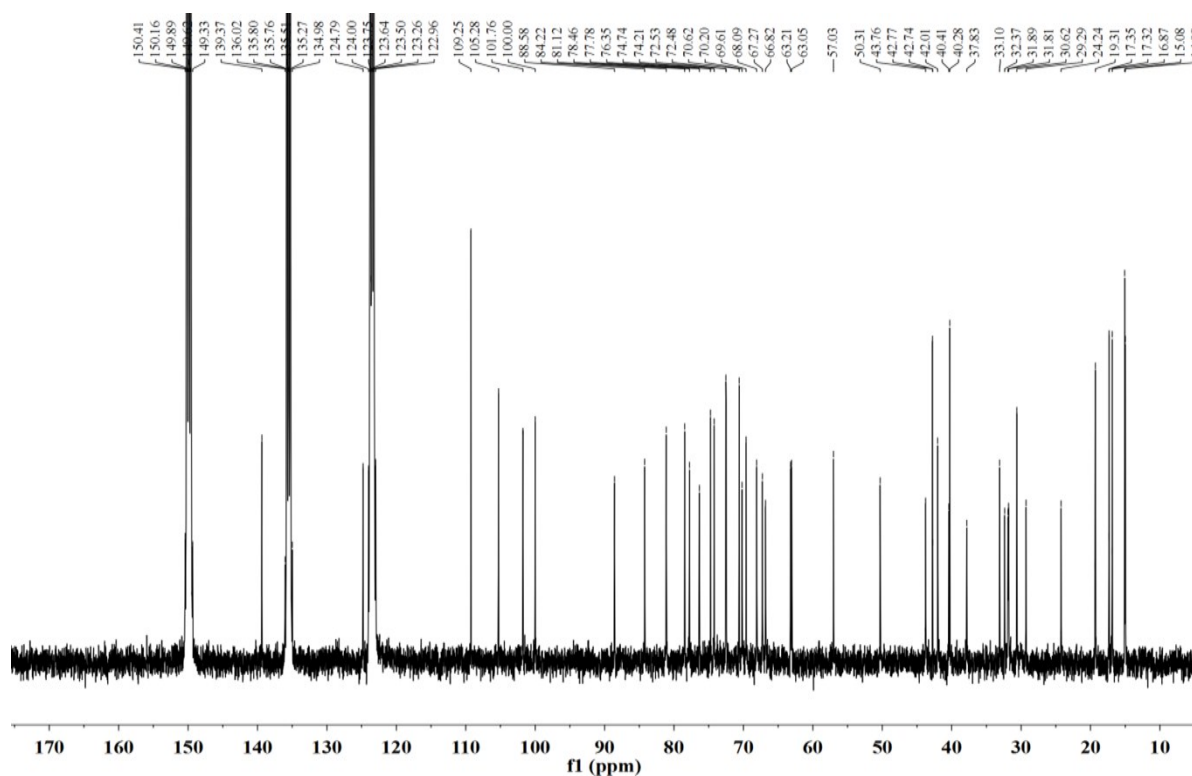

Figure S44. HSQC NMR spectrum of compound 7 (pyridine- $d_5$ )

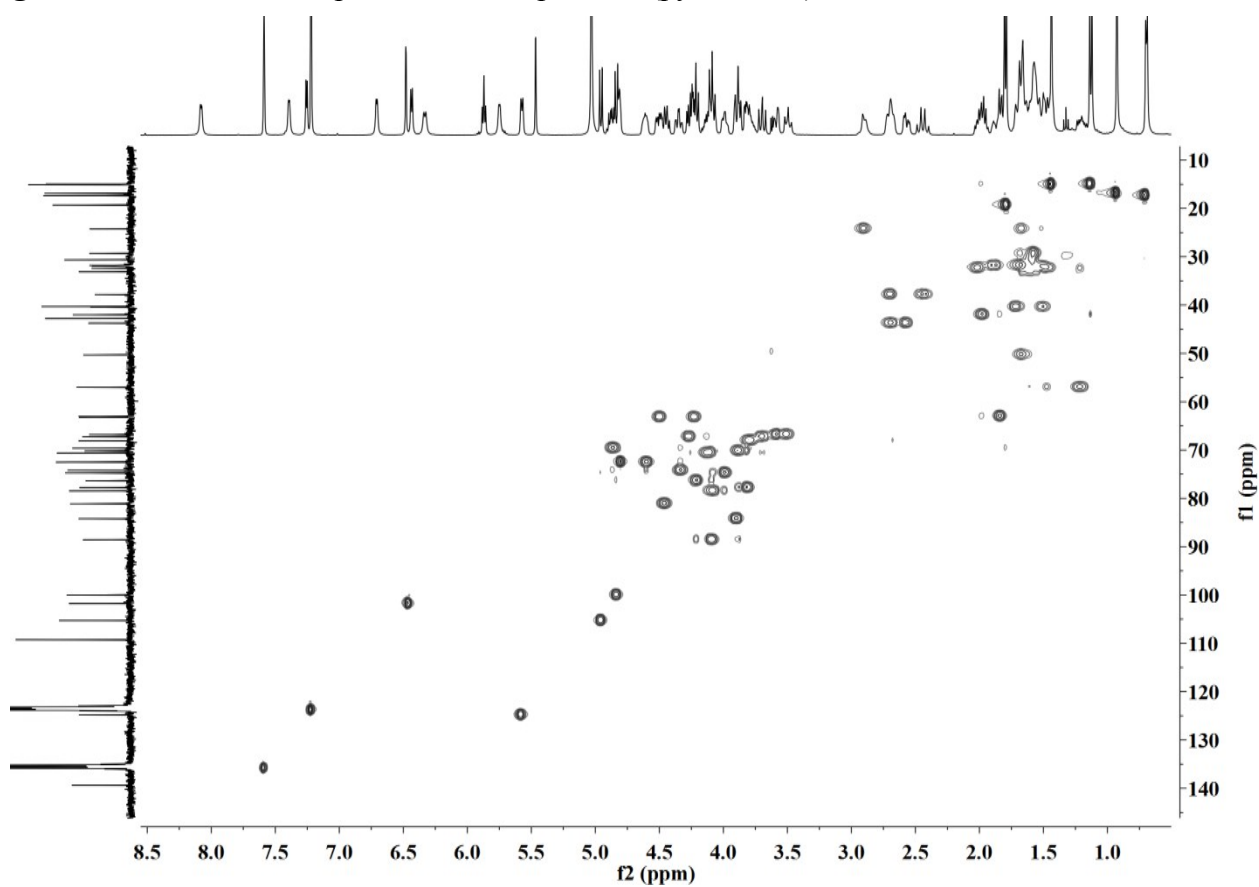

Figure S45. HMBC NMR spectrum of compound 7 (pyridine- $d_5$ )

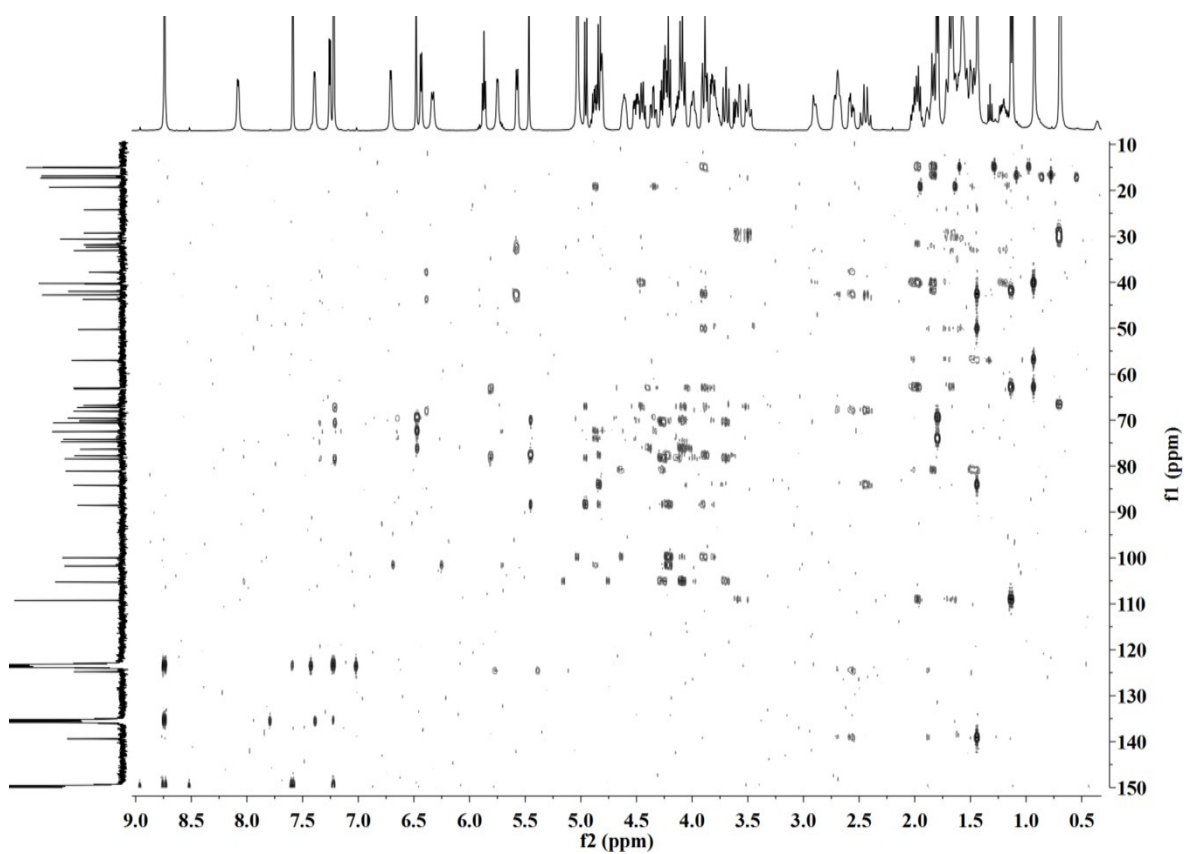

Figure S46. TOCSY NMR spectrum of compound 6 (pyridine- $d_5$ )

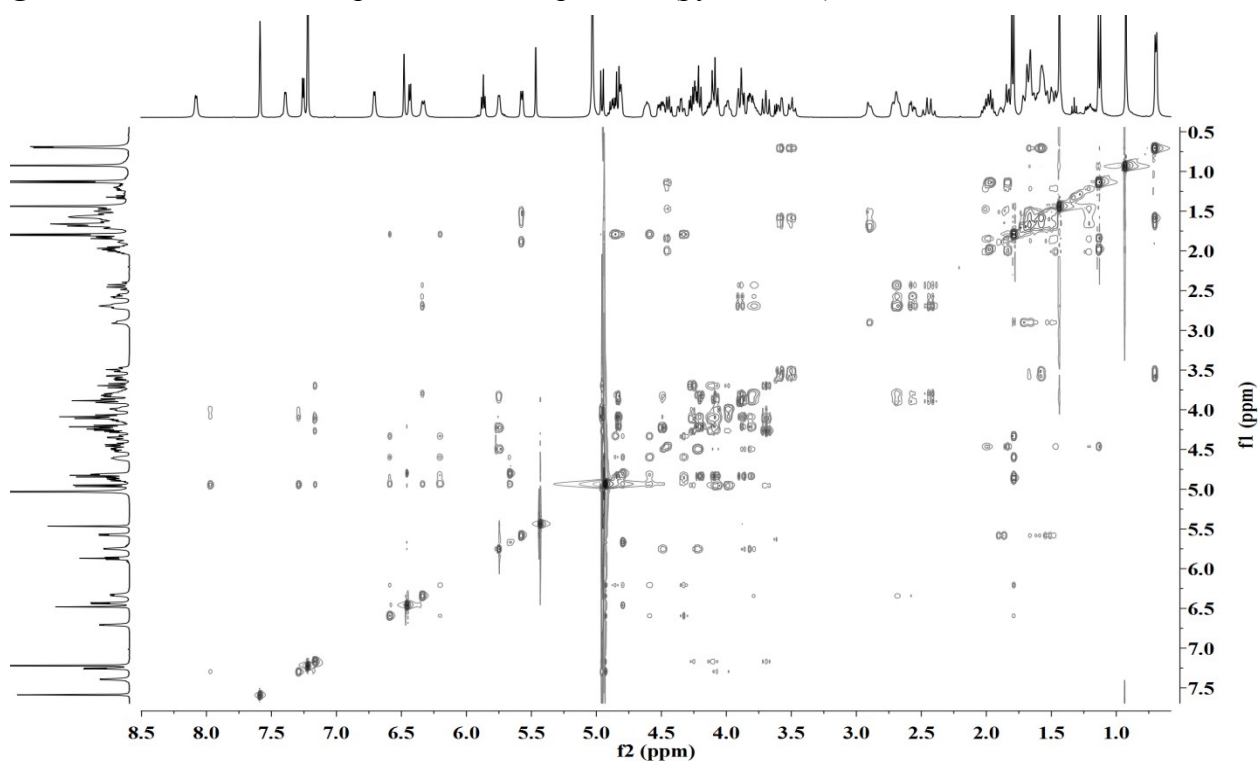

Figure S47. ESI-Q-TOF-MS spectrum of compound 7

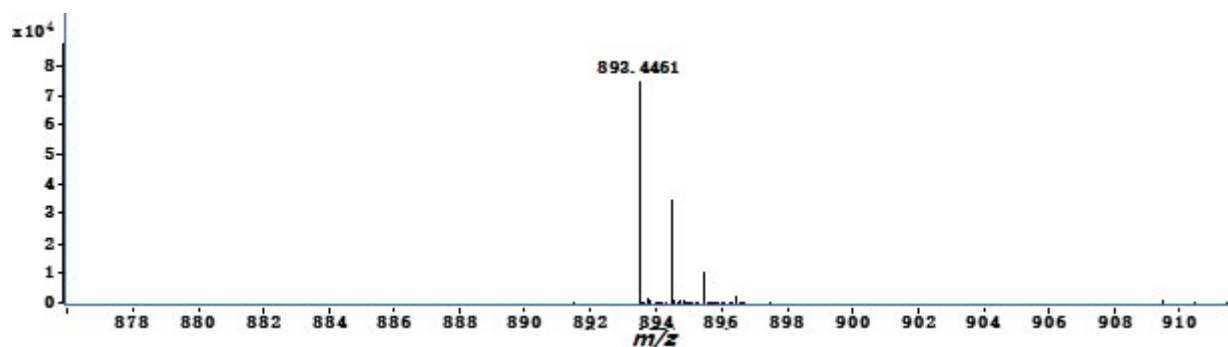

Figure S48. IR (KBr, disc) spectrum of compound 7

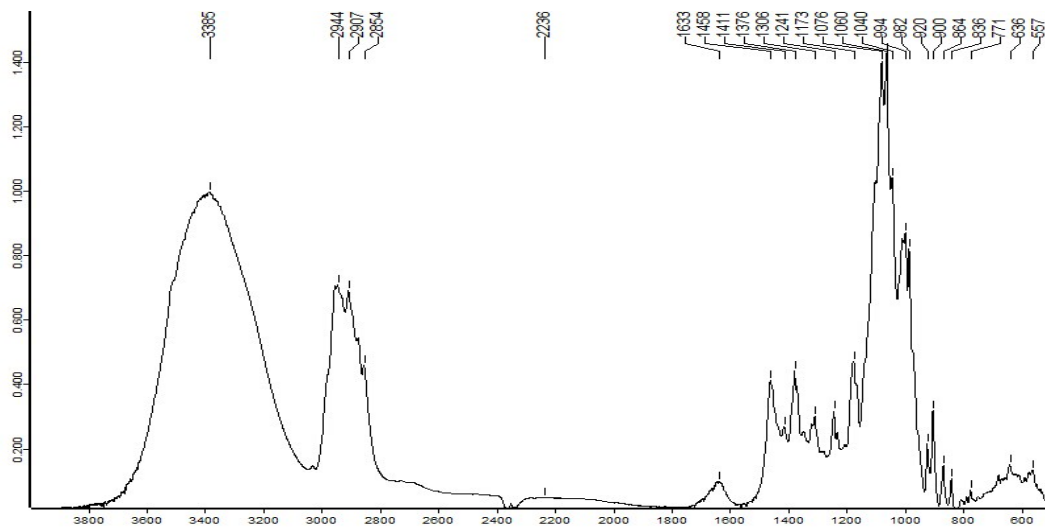





**Figure S51.** HSQC NMR spectrum of compound **8** (pyridine- $d_5$ )

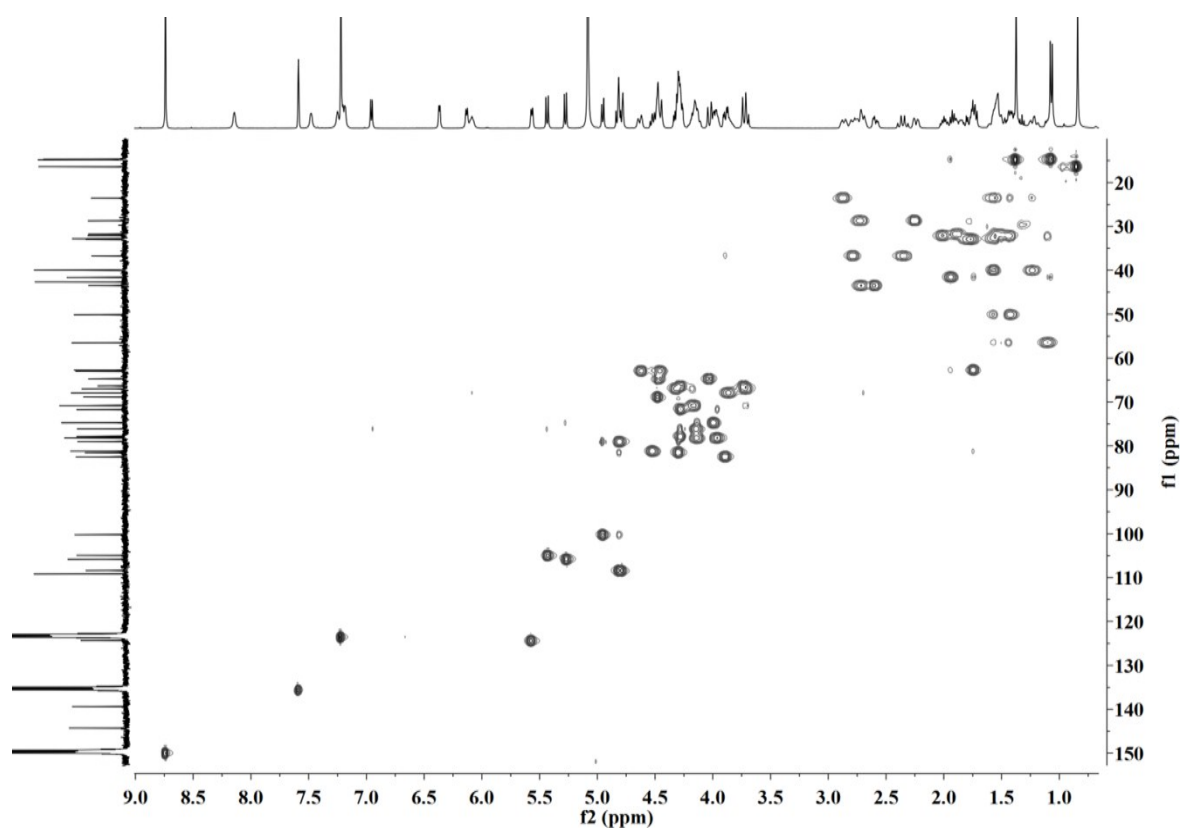

**Figure S52.** HMBC NMR spectrum of compound **8** (pyridine- $d_5$ )

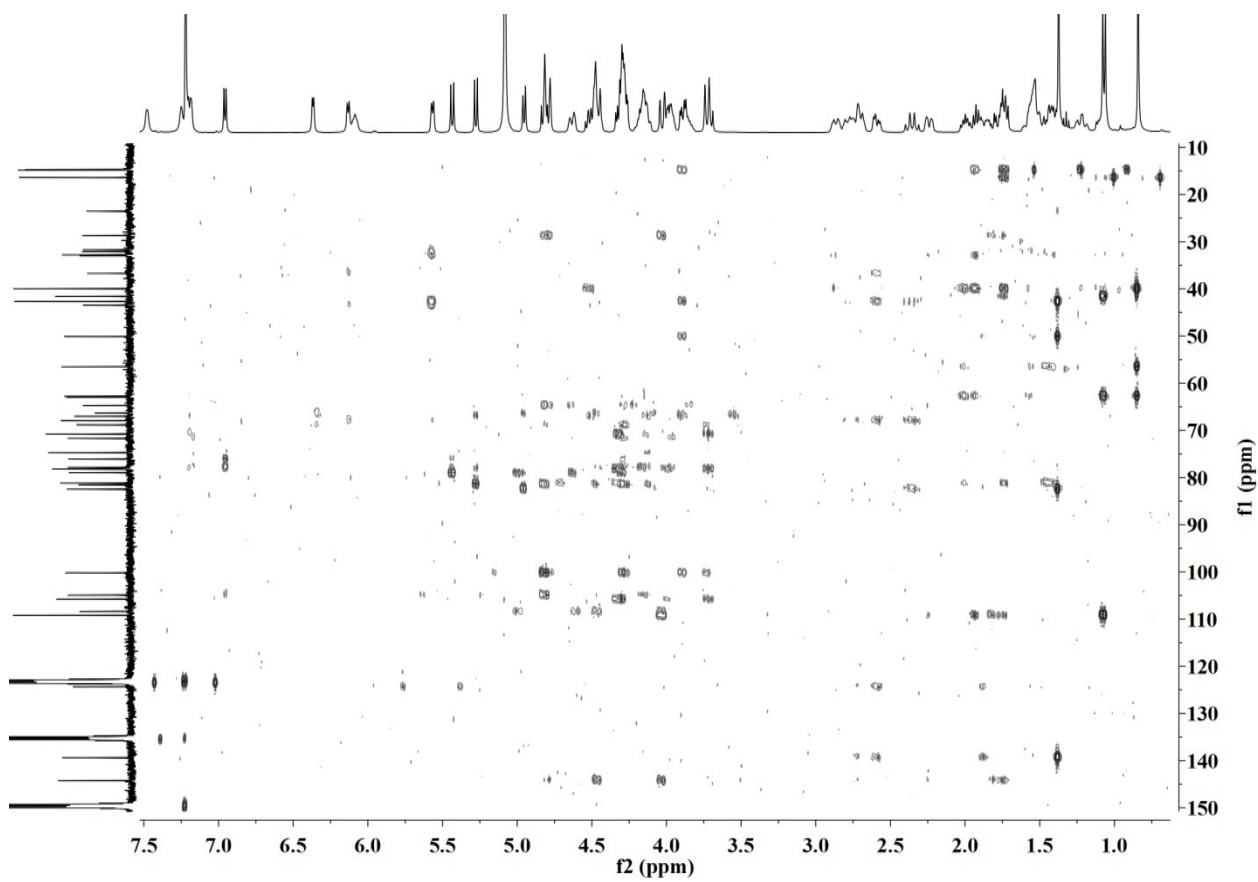

Figure S53. TOCSY NMR spectrum of compound **8** (pyridine- $d_5$ )

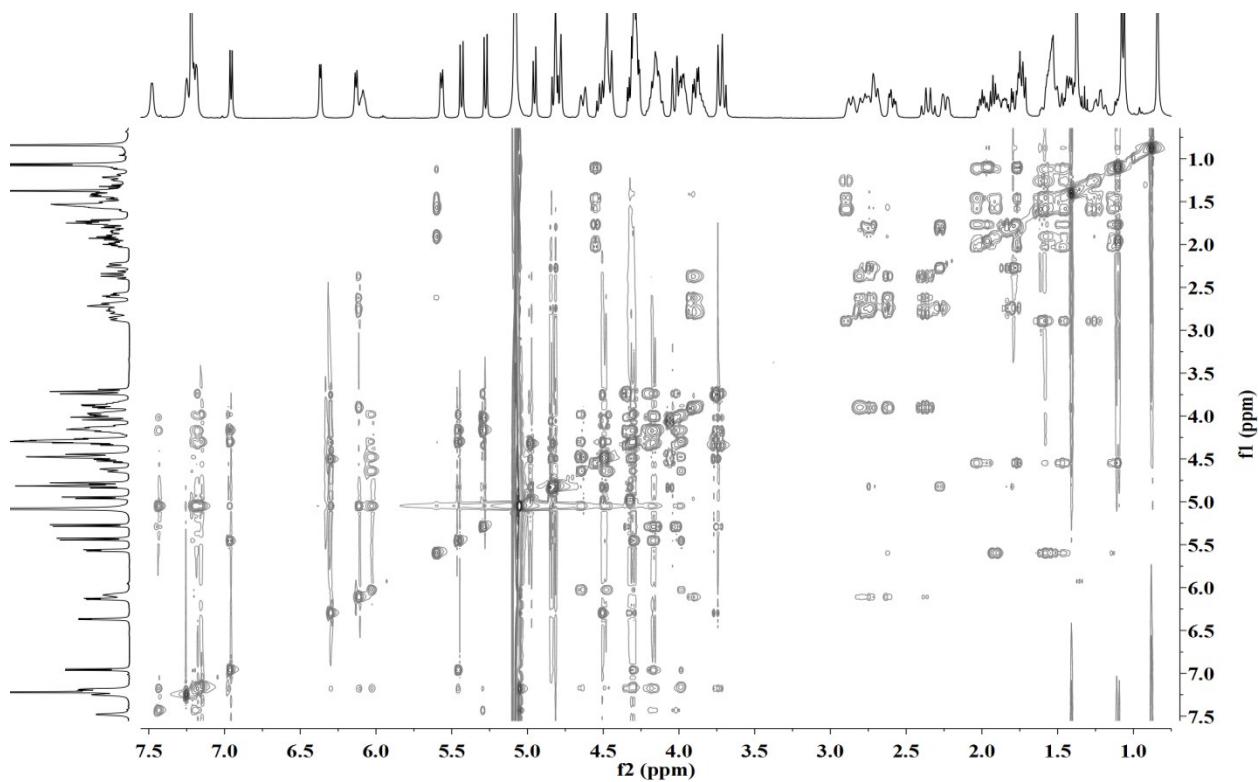

Figure S54. ESI-Q-TOF-MS spectrum of compound **8**

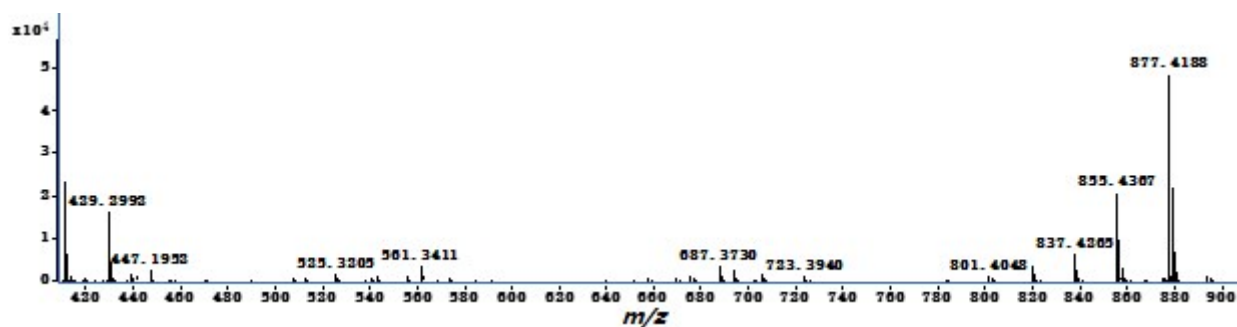

Figure S55. IR (KBr, disc) spectrum of compound **8**

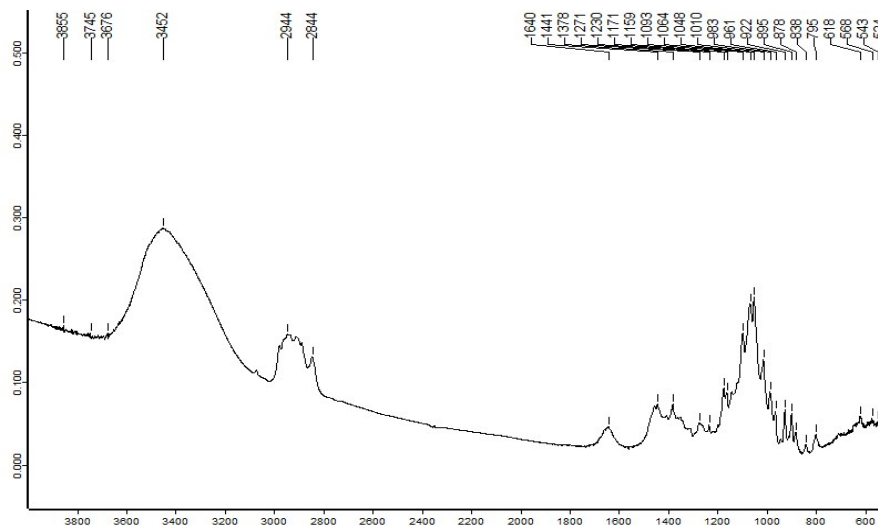

Figure S56.  $^1\text{H}$  NMR spectrum of compound **9** (pyridine- $d_5$ )

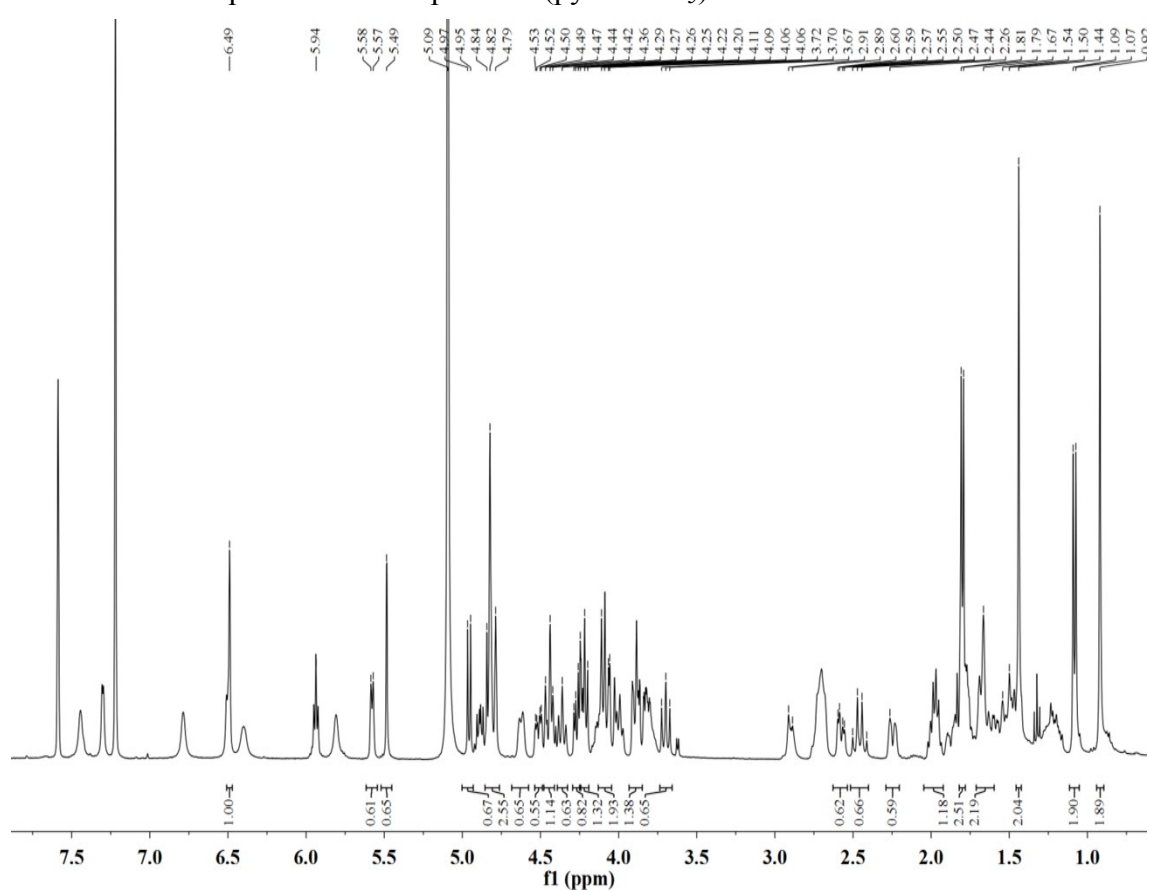

Figure S57.  $^{13}\text{C}$  NMR spectrum of compound **9** (pyridine- $d_5$ )

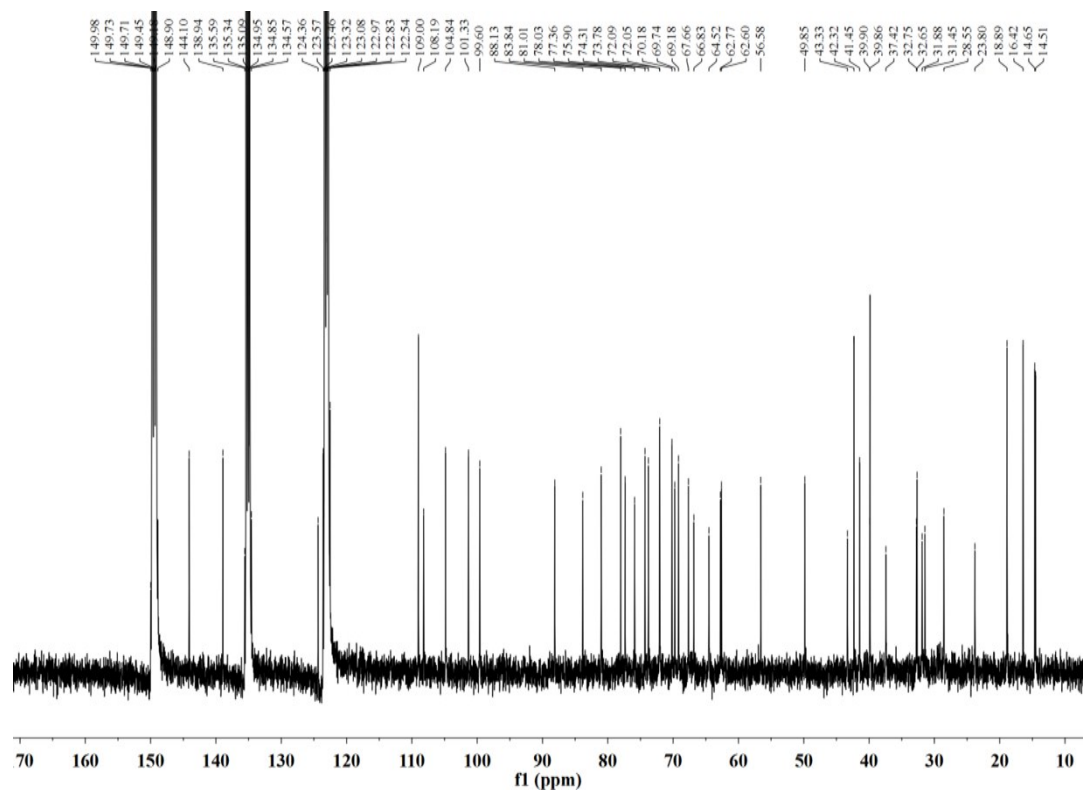

**Figure S58.** HSQC NMR spectrum of compound **9** (pyridine- $d_5$ )

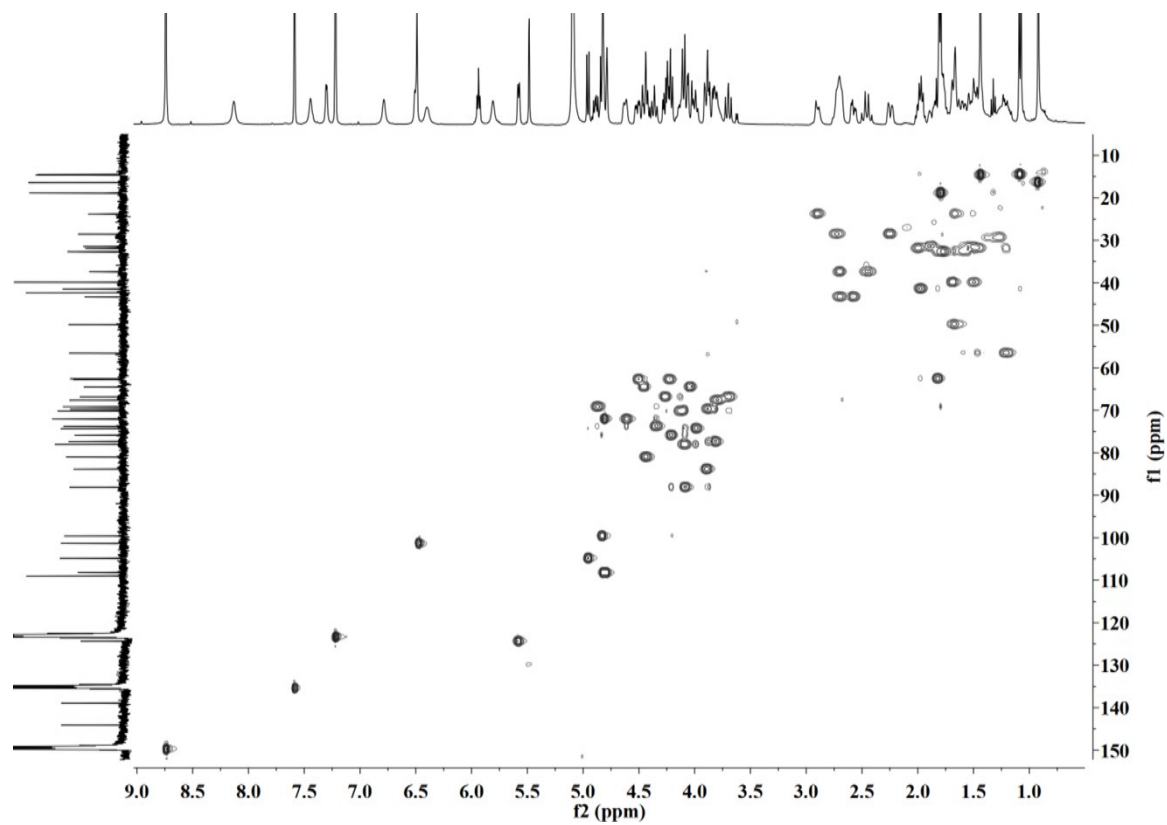

**Figure S59.** HMBC NMR spectrum of compound **9** (pyridine- $d_5$ )

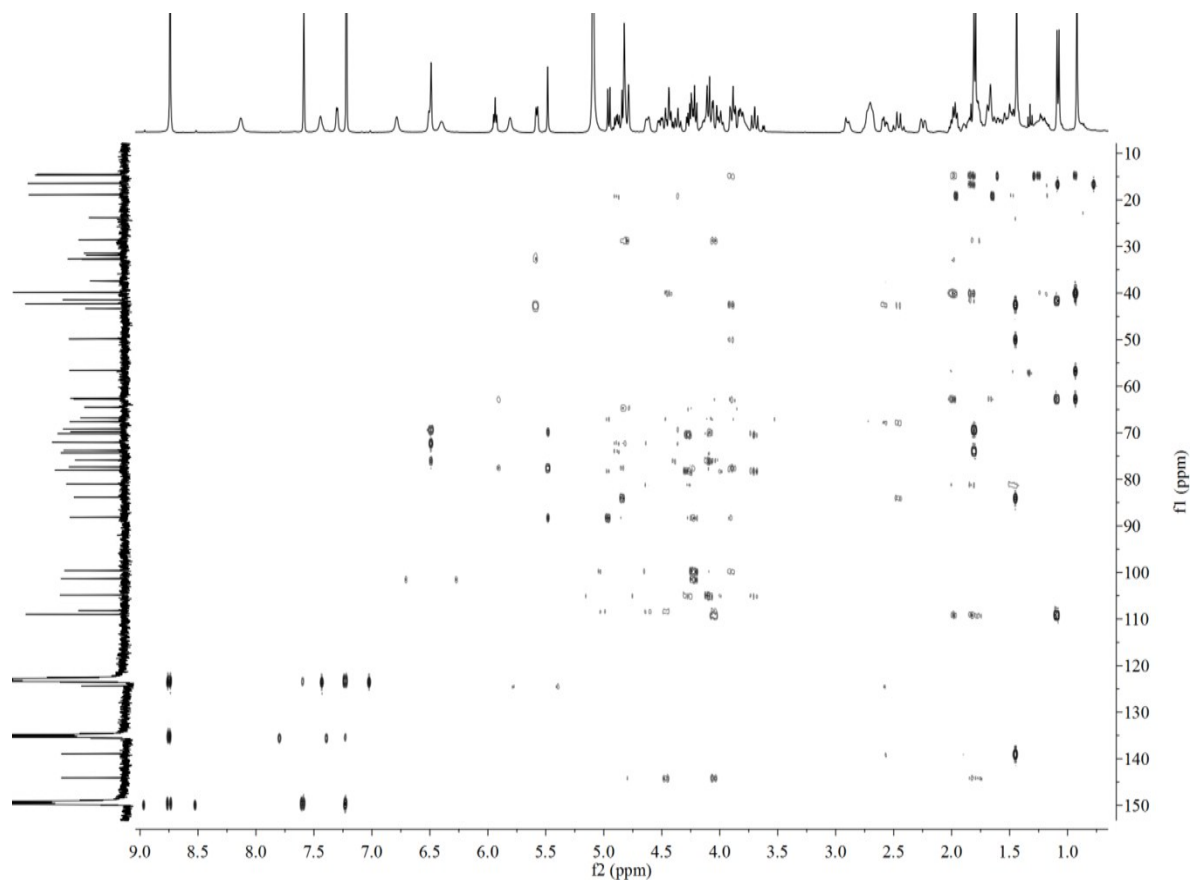

**Figure S60.** TOCSY NMR spectrum of compound **9** (pyridine- $d_5$ )

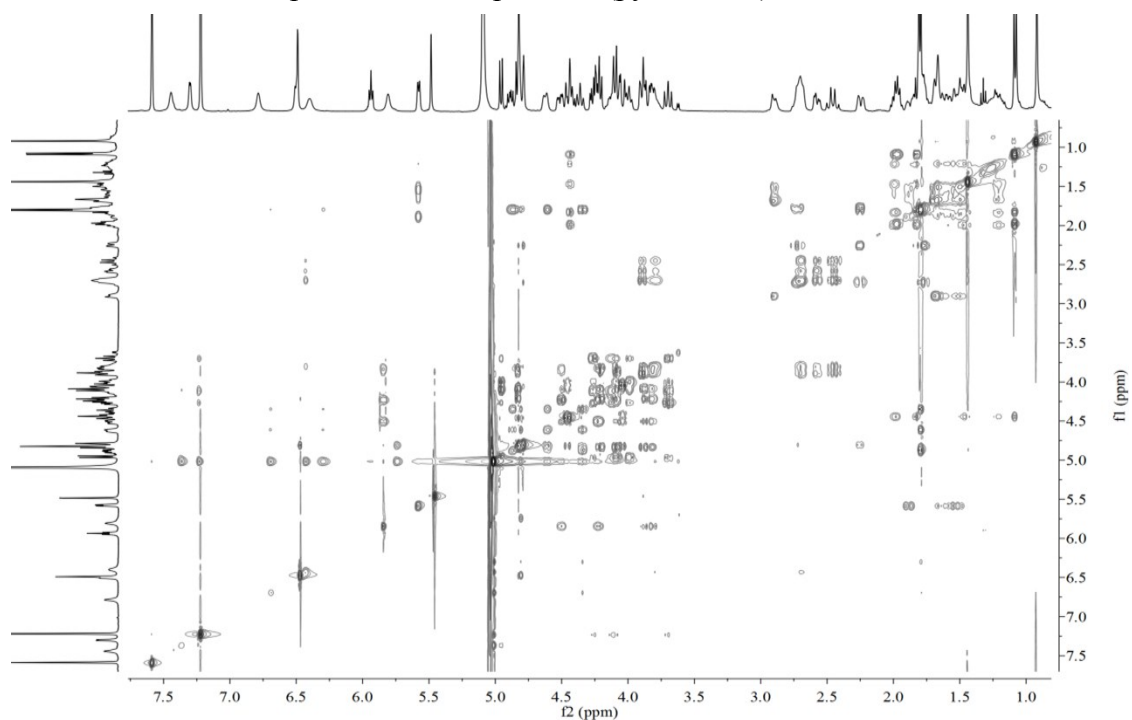

**Figure S61.** ESI-Q-TOF-MS spectrum of compound **9**

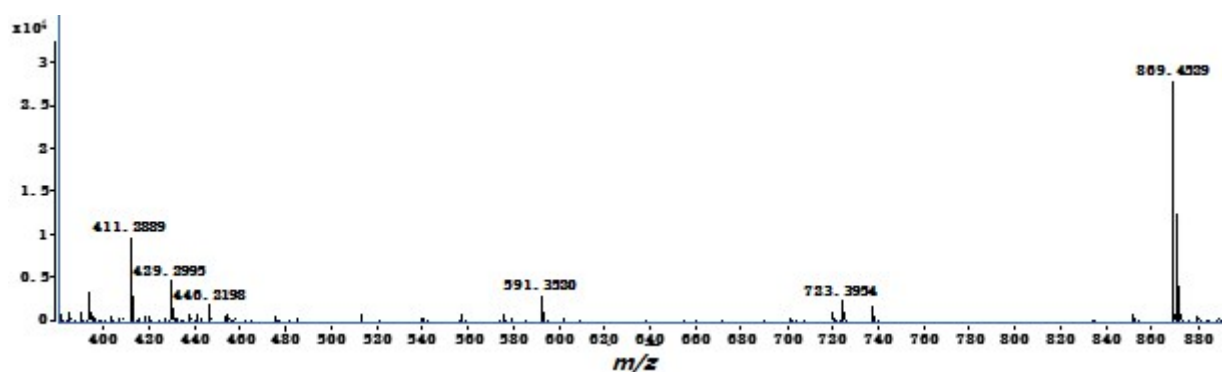

**Figure S62.** IR (KBr, disc) spectrum of compound **9**

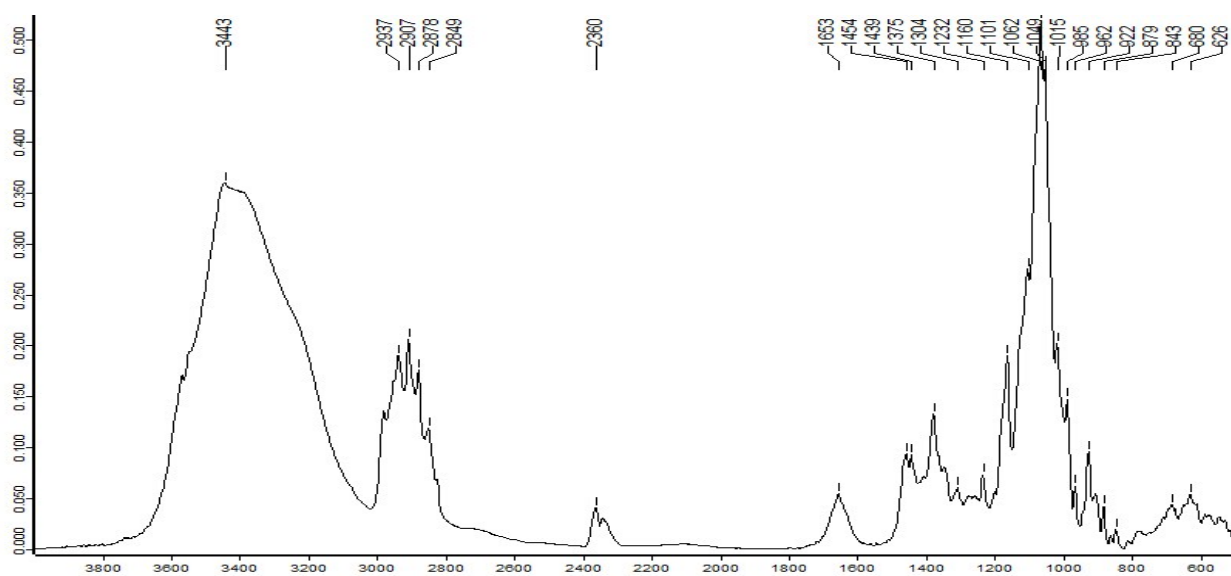

Figure S63.  $^1\text{H}$  NMR spectrum of compound **10** (pyridine- $d_5$ )

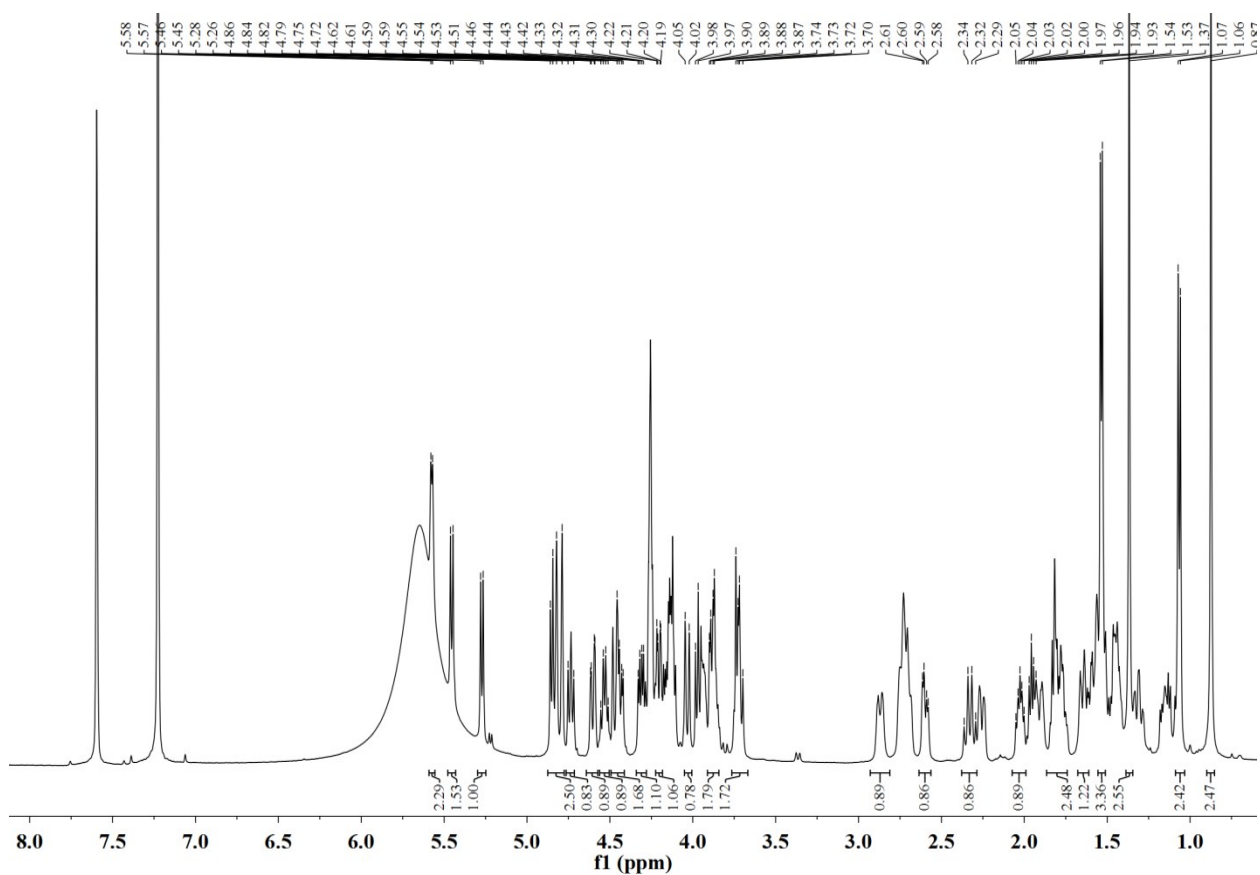

Figure S64.  $^{13}\text{C}$  NMR spectrum of compound **10** (pyridine- $d_5$ )

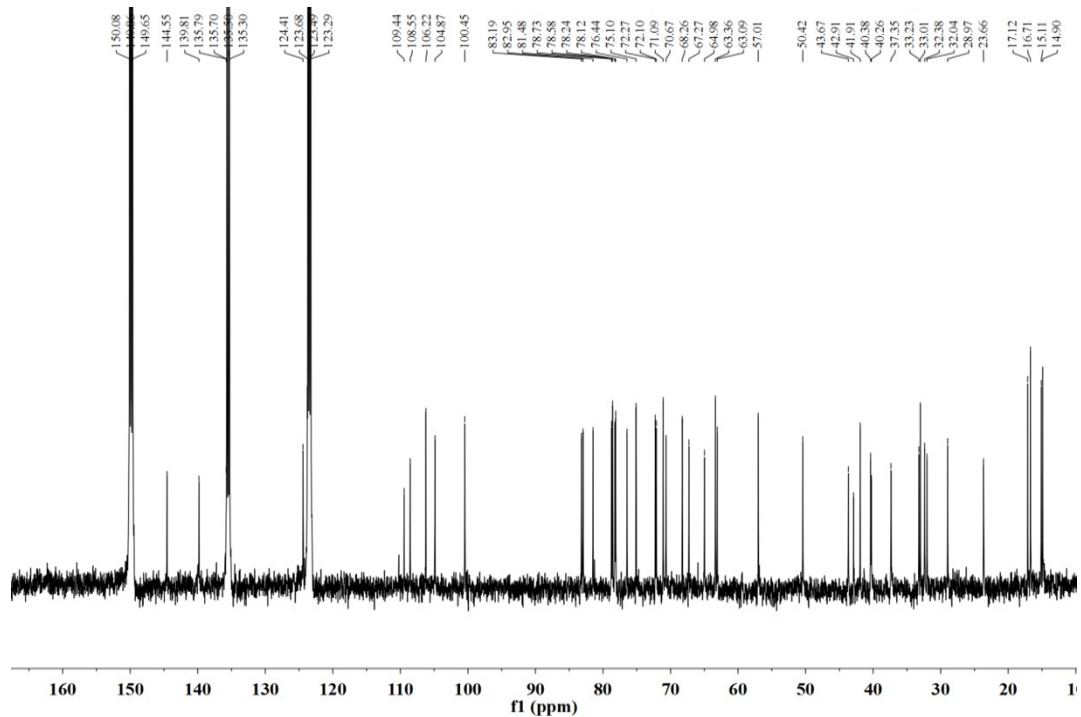

**Figure S65.** HSQC NMR spectrum of compound **10** (pyridine- $d_5$ )

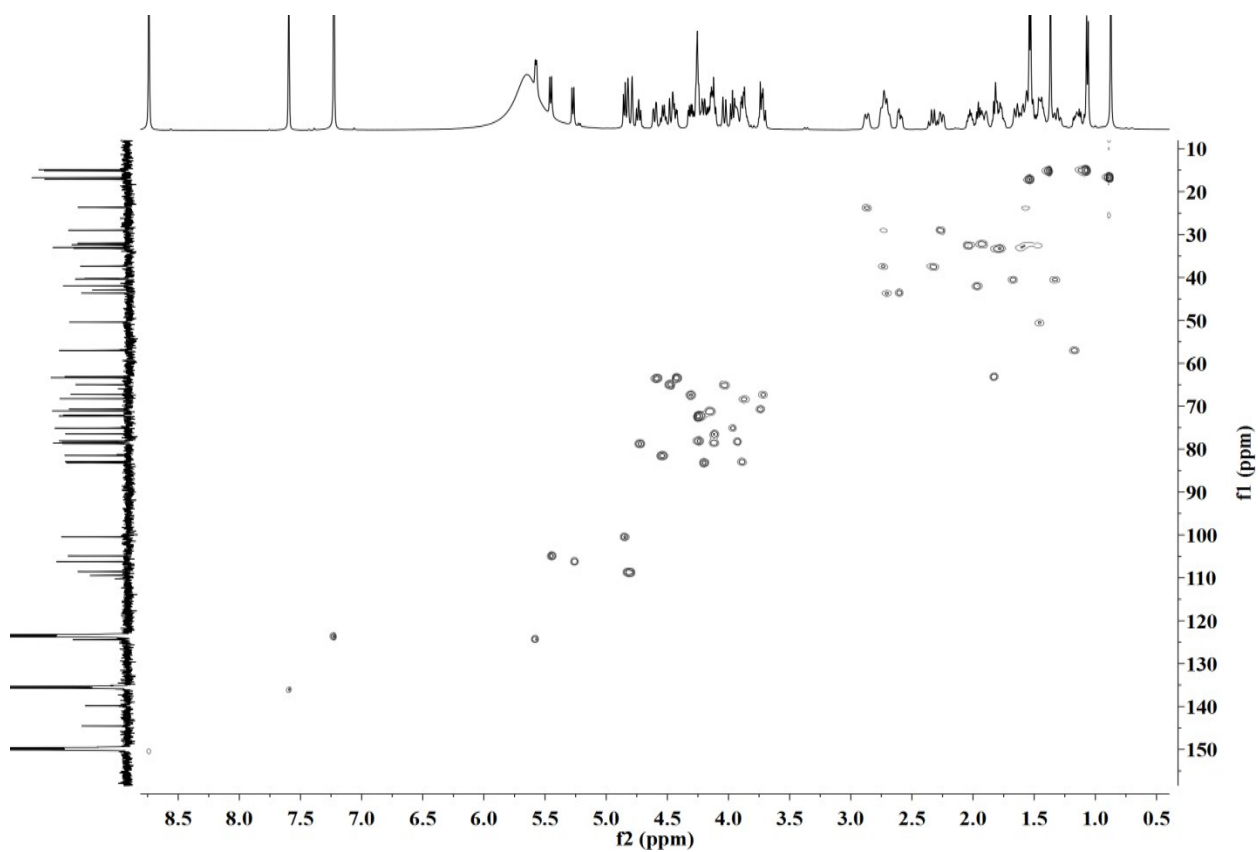

**Figure S66.** HMBC NMR spectrum of compound **10** (pyridine- $d_5$ )

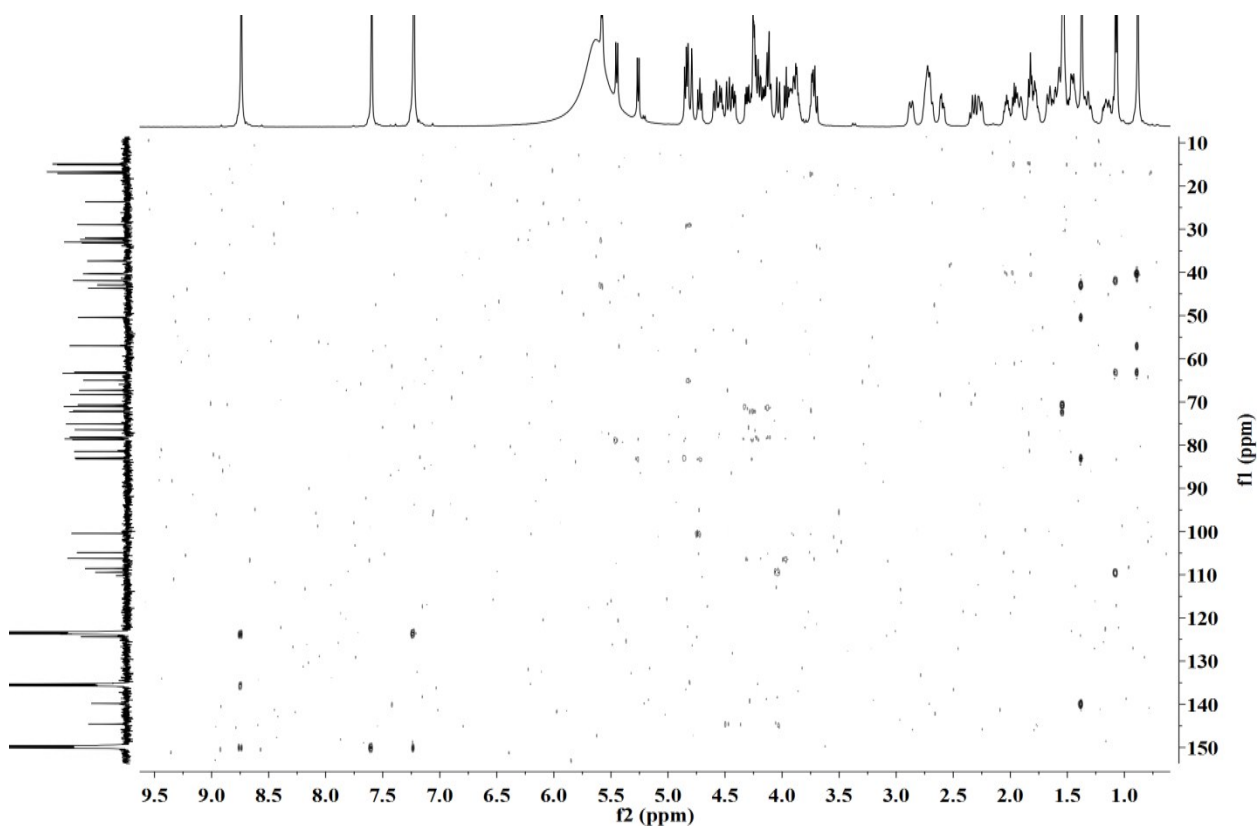



Figure S67. TOCSY NMR spectrum of compound **10** (pyridine- $d_5$ )

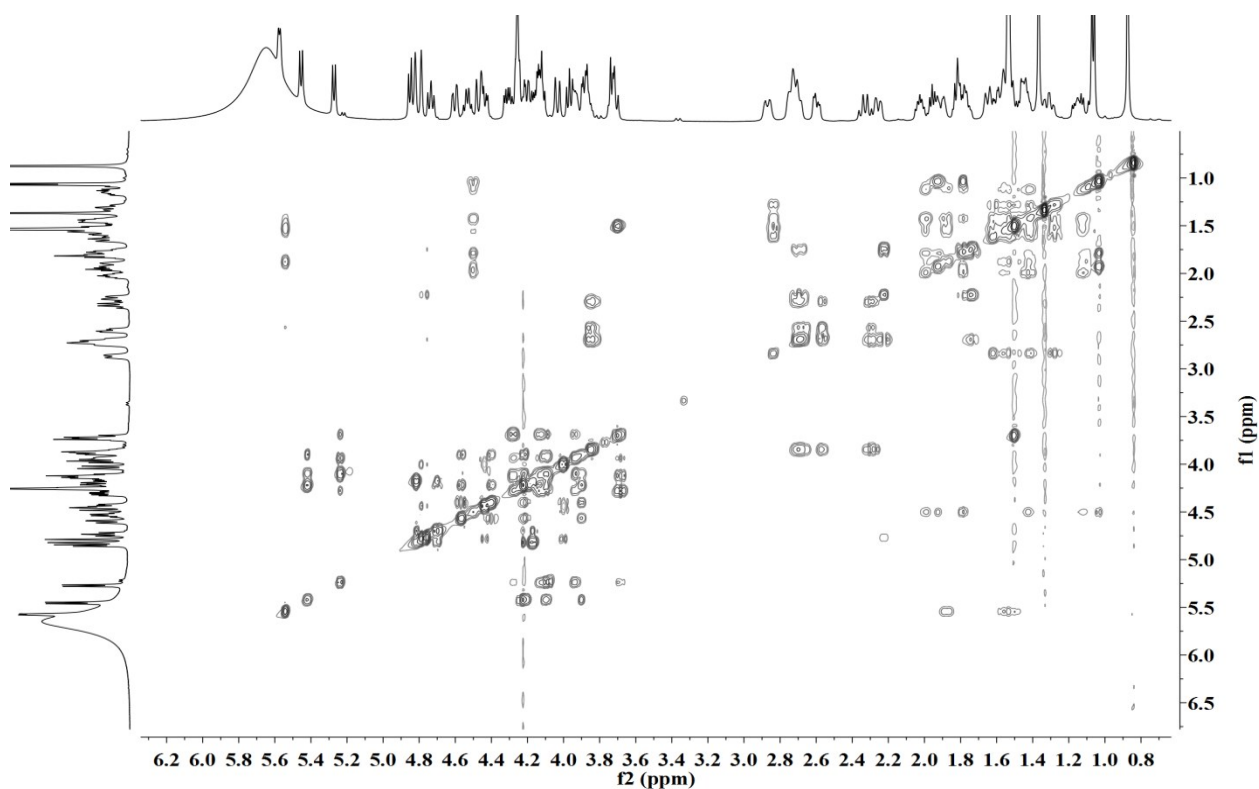

Figure S68. ESI-Q-TOF-MS spectrum of compound **10**

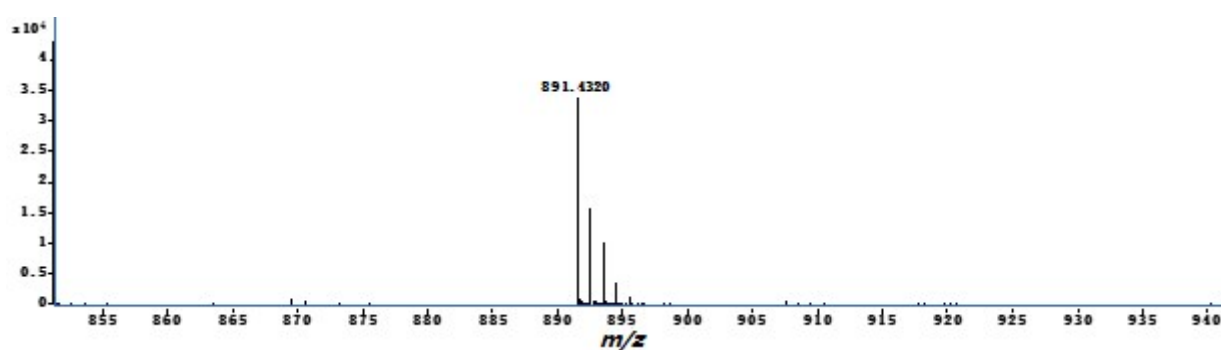

Figure S69. IR (KBr, disc) spectrum of compound **10**

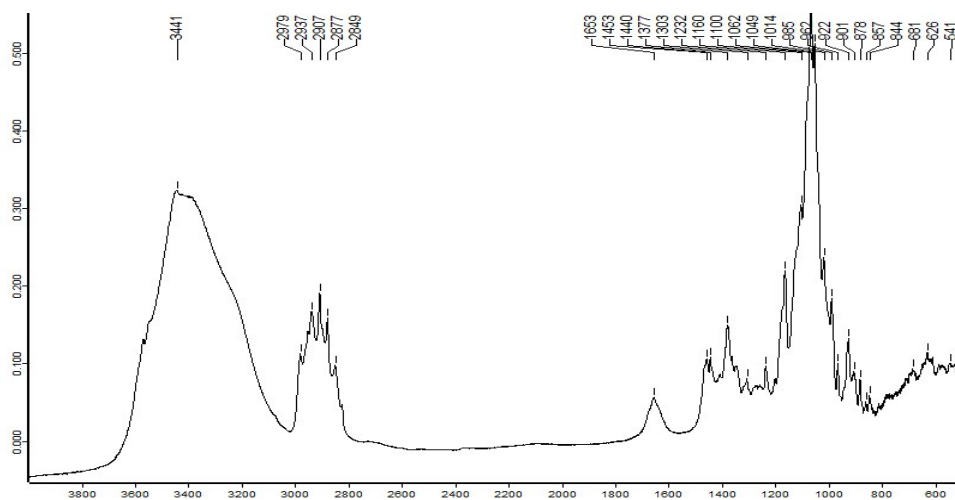

Figure S70.  $^1\text{H}$  NMR spectrum of compound **11** (pyridine- $d_5$ )

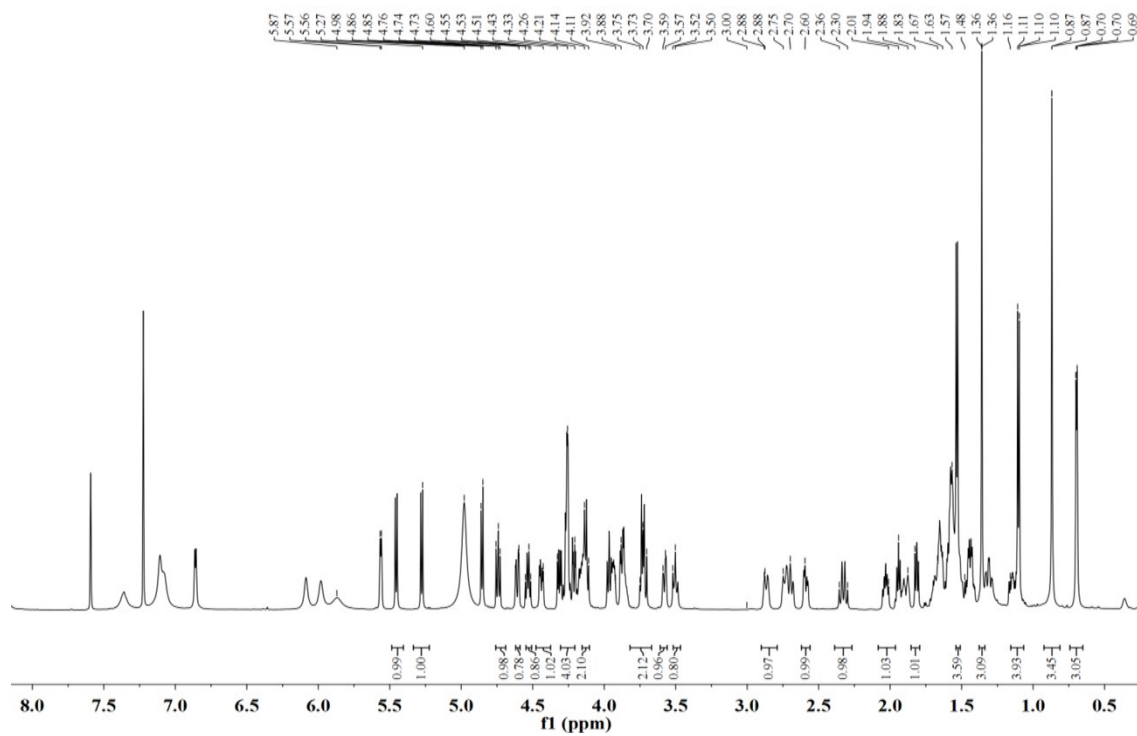

Figure S71.  $^{13}\text{C}$  NMR spectrum of compound **11** (pyridine- $d_5$ )

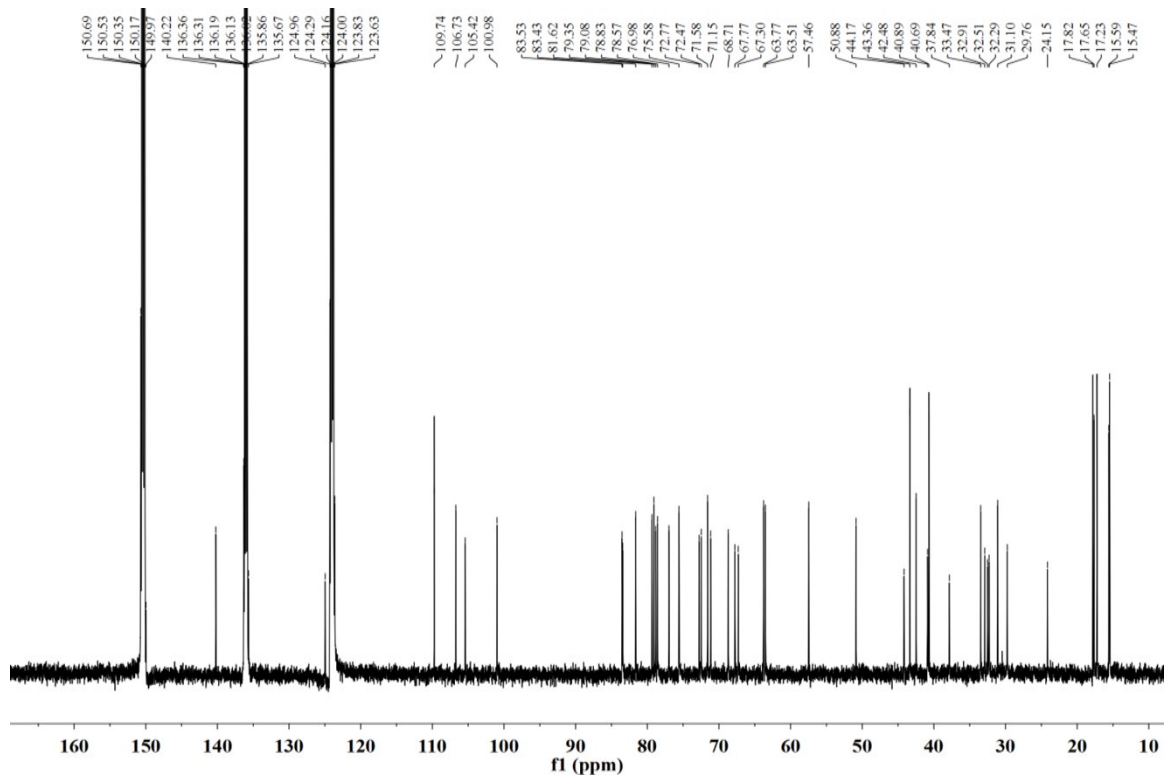

Figure S72.  $^1\text{H}$  NMR spectrum of compound 12 (pyridine- $d_5$ )

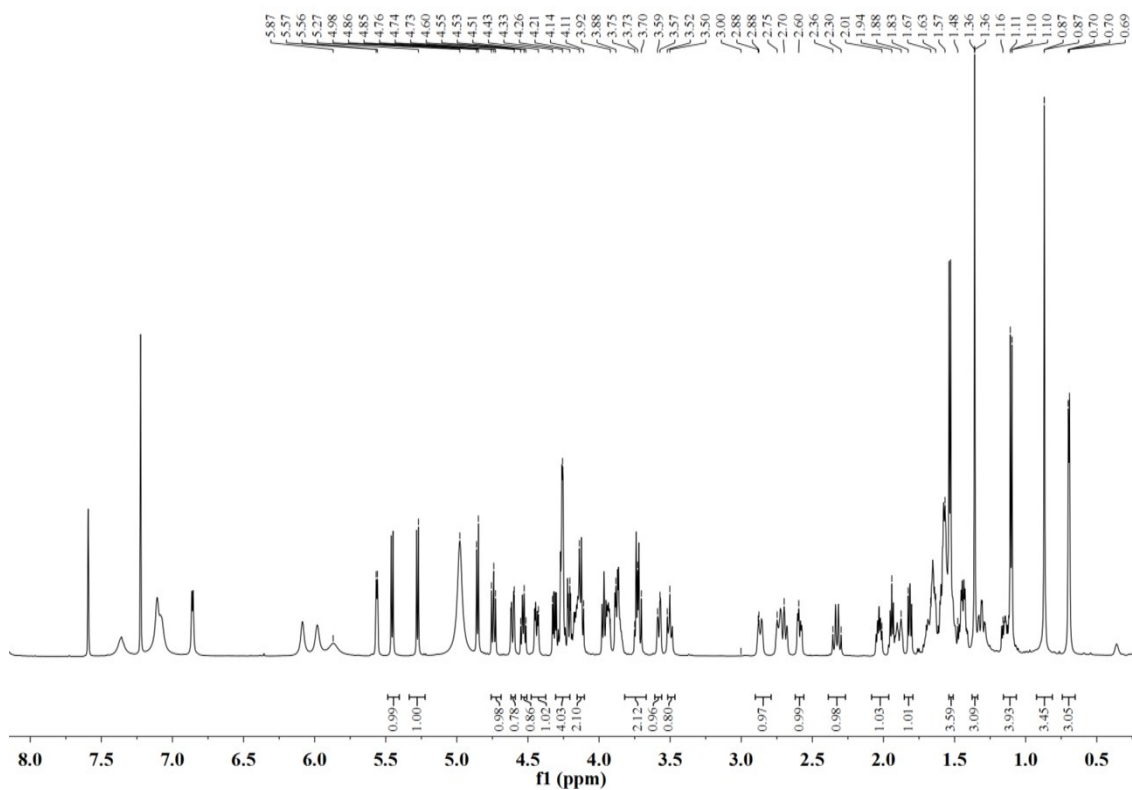

Figure 73.  $^{13}\text{C}$  NMR spectrum of compound 12 (pyridine- $d_5$ )

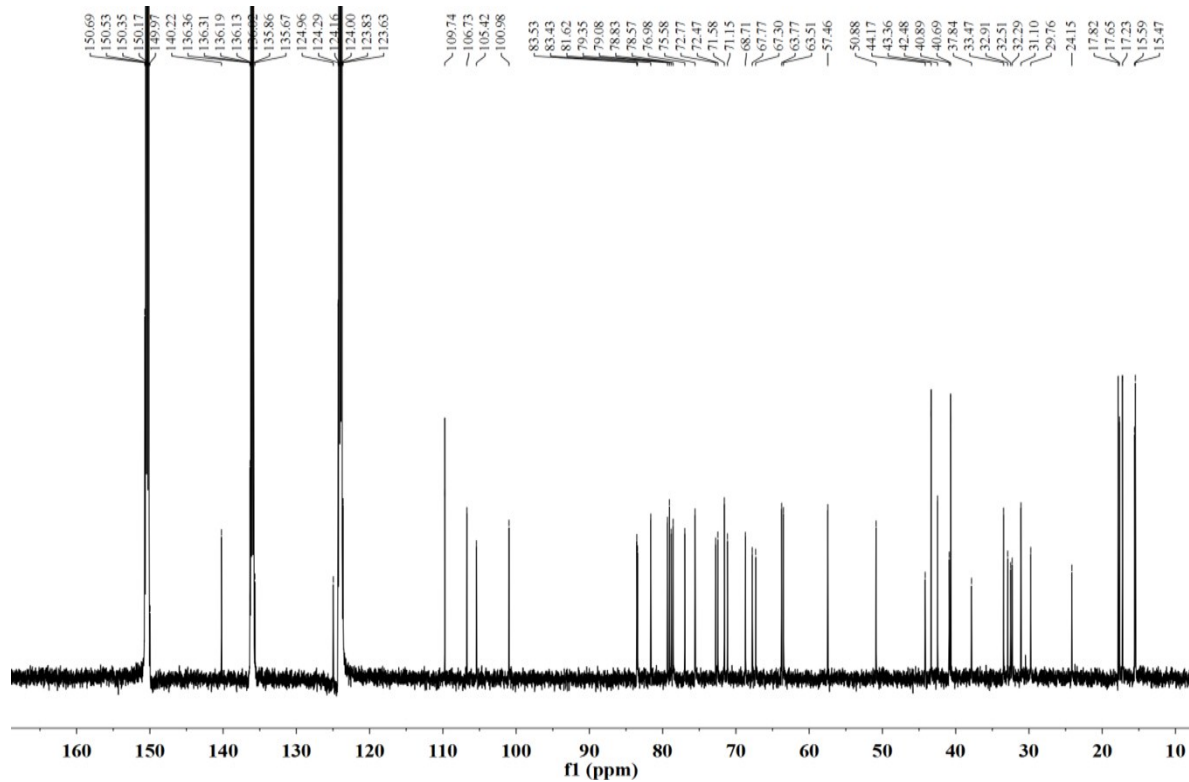

Figure S74.  $^1\text{H}$  NMR spectrum of compound 13 (pyridine- $d_5$ )

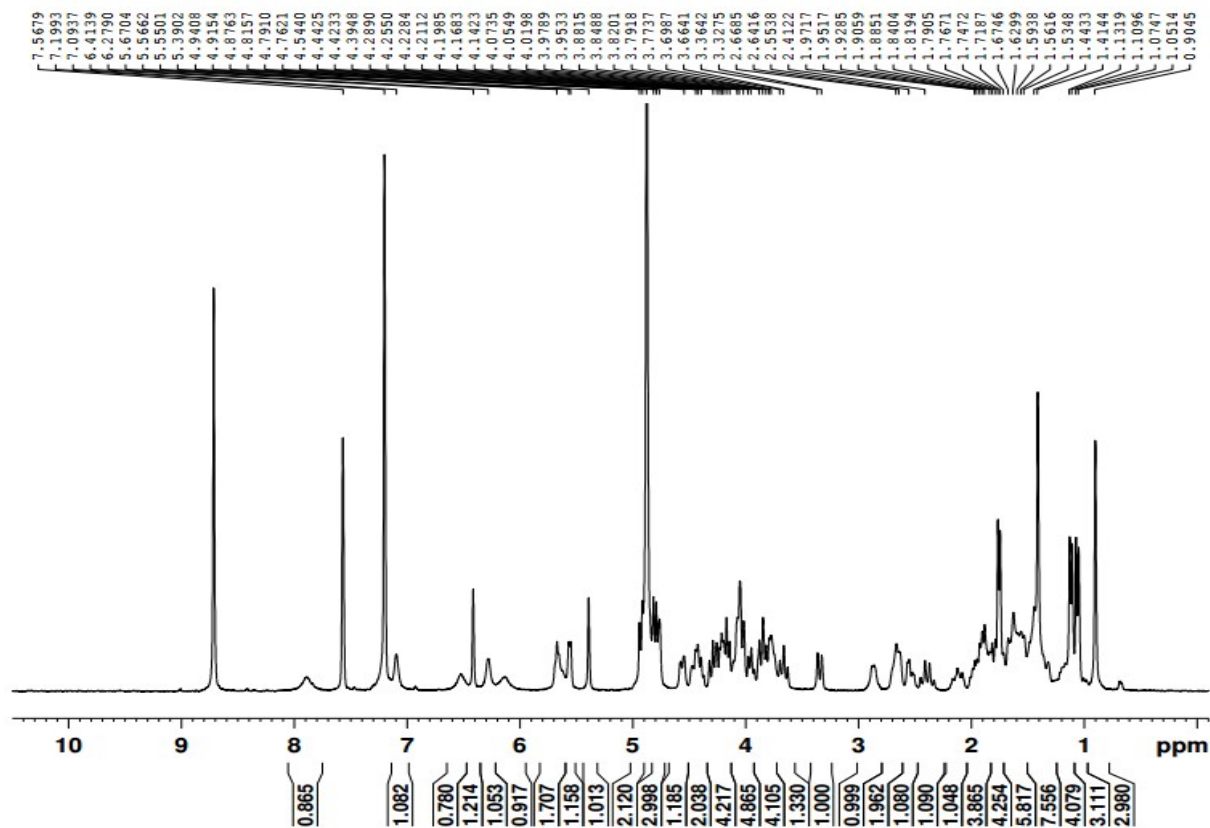

Figure S75.  $^{13}\text{C}$  NMR spectrum of compound 13 (pyridine- $d_5$ )

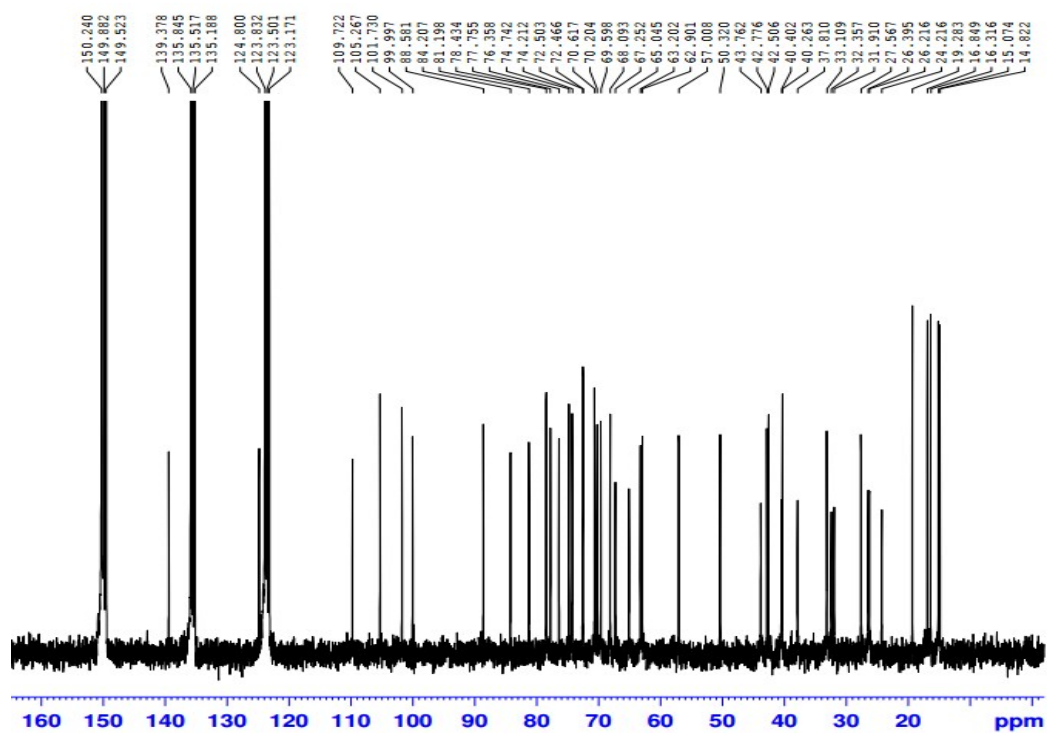

Supplement: c6ra26031d1.pdf [file c6ra26031d1.pdf]
